# Supplementary material for: Human plasma IgG1 repertoires are simple, unique, and dynamic
Source: PubMed Central journal article supplement — Cell Syst. 2021 Dec 15;12(12):1131–1143.e5. doi: 10.1016/j.cels.2021.08.008 (PMC8691384; doi:10.1016/j.cels.2021.08.008), 2021-12-15

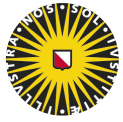

# *Patient M56 T4 example MS data corresponding to LC chromatogram*

**Human plasma IgG1 repertoires are simple, unique, and dynamic**

Albert Bondt<sup>1,2,\*</sup>, Max Hoek<sup>1,2,\*</sup>, Sem Tamara<sup>1,2,\*</sup>, Bastiaan de Graaf<sup>1,2</sup>, Weiwei Peng<sup>1,2</sup>, Douwe Schulte<sup>1,2</sup>, Danique M.H. van Rijswijck<sup>1,2</sup>, Maurits A. den Boer<sup>1,2</sup>, Jean-François Greisch<sup>1,2</sup>, Meri R.J. Varkila<sup>3,4</sup>, Joost Snijder<sup>1,2</sup>, Olaf L. Cremer<sup>4</sup>, Marc J.M. Bonten<sup>3,5</sup>, Albert J.R. Heck<sup>1,2,‡</sup>

<sup>1</sup> Biomolecular Mass Spectrometry and Proteomics, Bijvoet Center for Biomolecular Research and Utrecht Institute for Pharmaceutical Sciences, University of Utrecht, Padualaan 8, Utrecht 3584 CH, The Netherlands

<sup>2</sup> Netherlands Proteomics Center, Padualaan 8, Utrecht 3584 CH, The Netherlands

<sup>3</sup> Julius Center for Health Sciences and Primary Care, University Medical Center Utrecht, Utrecht, The Netherlands

<sup>4</sup> Department of Intensive Care Medicine, University Medical Center Utrecht, Utrecht, Netherlands

<sup>5</sup> Department of Medical Microbiology, University Medical Center Utrecht, Utrecht, Netherlands

# Important notes

- The retention time (RT) in the table is after correction
- The depicted chromatogram is before RT correction

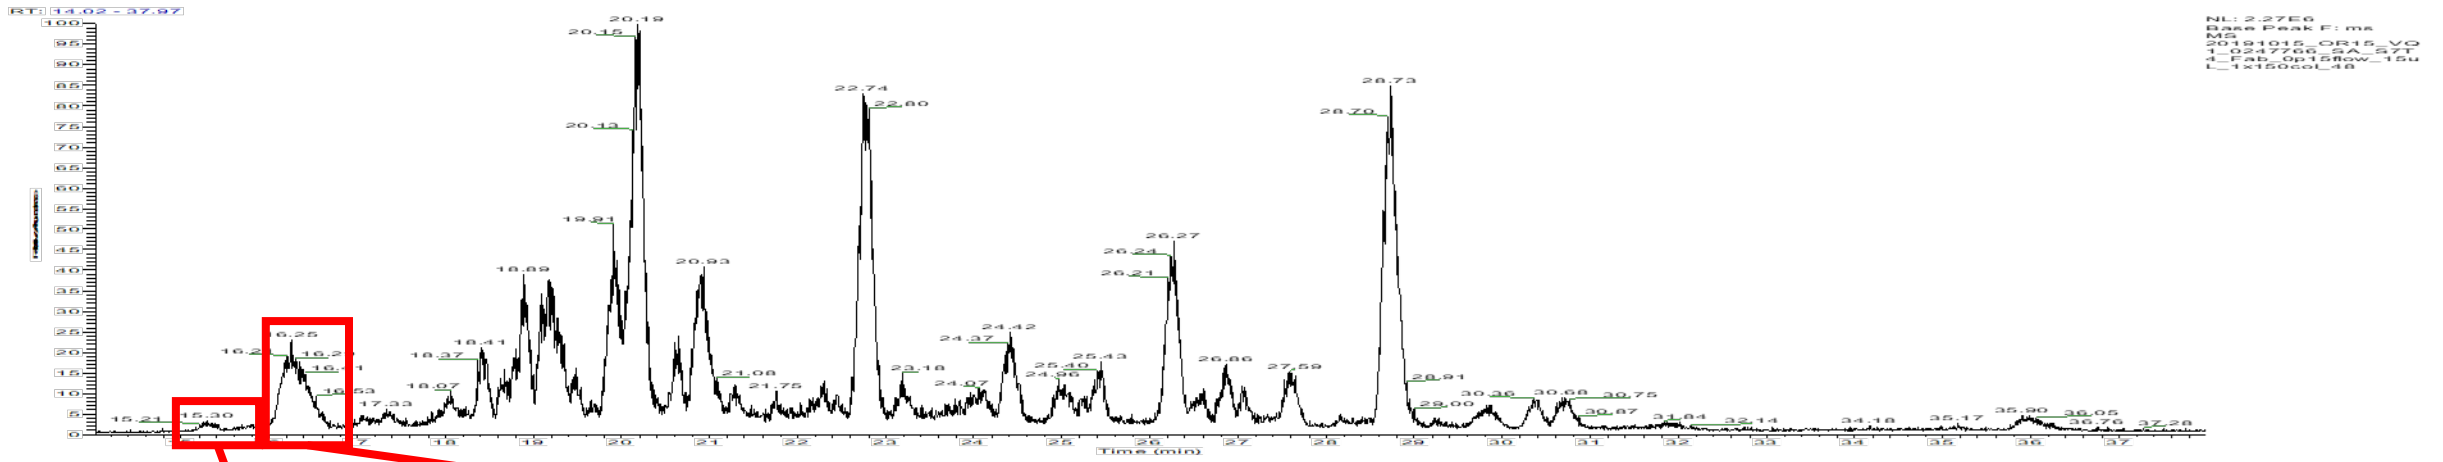

20191015\_OR15\_VQ1\_0247766\_SA\_S7T4\_Fab\_0p15flow\_15uL\_1x150col\_48 #2427-2615 RT: 14.90-15.90 AV: 189 NL: 1.30E4  
T: FTMS + p ESI sid=15.00 Full ms [500.0000-3000.0000]

| Average_Mass | Apex_RT | Concentration |
|--------------|---------|---------------|
| 47637.6      | 15.69   | 6.71          |
| 47232.5      | 15.72   | 1.02          |
| 45886.3      | 15.97   | 0.69          |
| 47713.2      | 16.19   | 2.64          |
| 48277.3      | 16.22   | 8.43          |

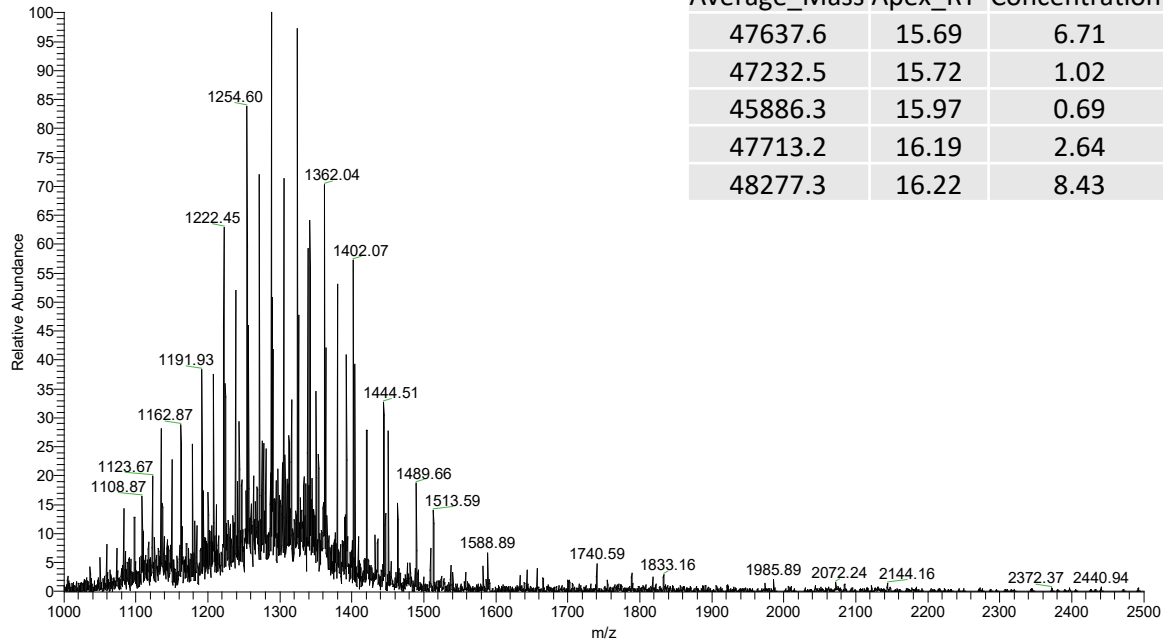

20191015\_OR15\_VQ1\_0247766\_SA\_S7T4\_Fab\_0p15flow\_15uL\_1x150col\_48 #2615-2803 RT: 15.90-16.90 AV: 189 NL: 1.42E5  
T: FTMS + p ESI sid=15.00 Full ms [500.0000-3000.0000]

| Average_Mass | Apex_RT | Concentration |
|--------------|---------|---------------|
| 47353.9      | 16.35   | 3.23          |
| 47673.5      | 16.35   | 0.26          |
| 47583.2      | 16.44   | 5.65          |
| 48177.0      | 16.57   | 0.80          |
| 47858.6      | 16.60   | 1.36          |
| 47593.5      | 16.62   | 1.36          |
| 47696.9      | 16.64   | 104.52        |
| 47475.3      | 16.87   | 1.07          |
| 46769.9      | 17.12   | 0.63          |
| 47740.7      | 17.12   | 0.58          |
| 48219.6      | 17.19   | 0.33          |
| 47648.8      | 17.27   | 0.41          |
| 46627.8      | 17.29   | 2.72          |

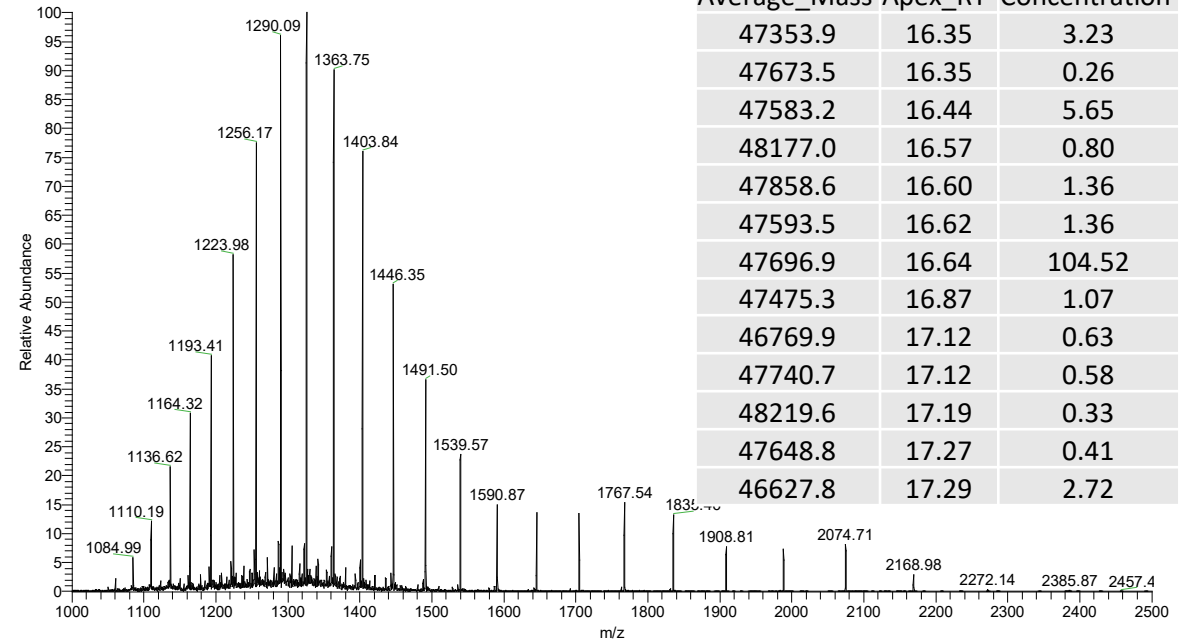

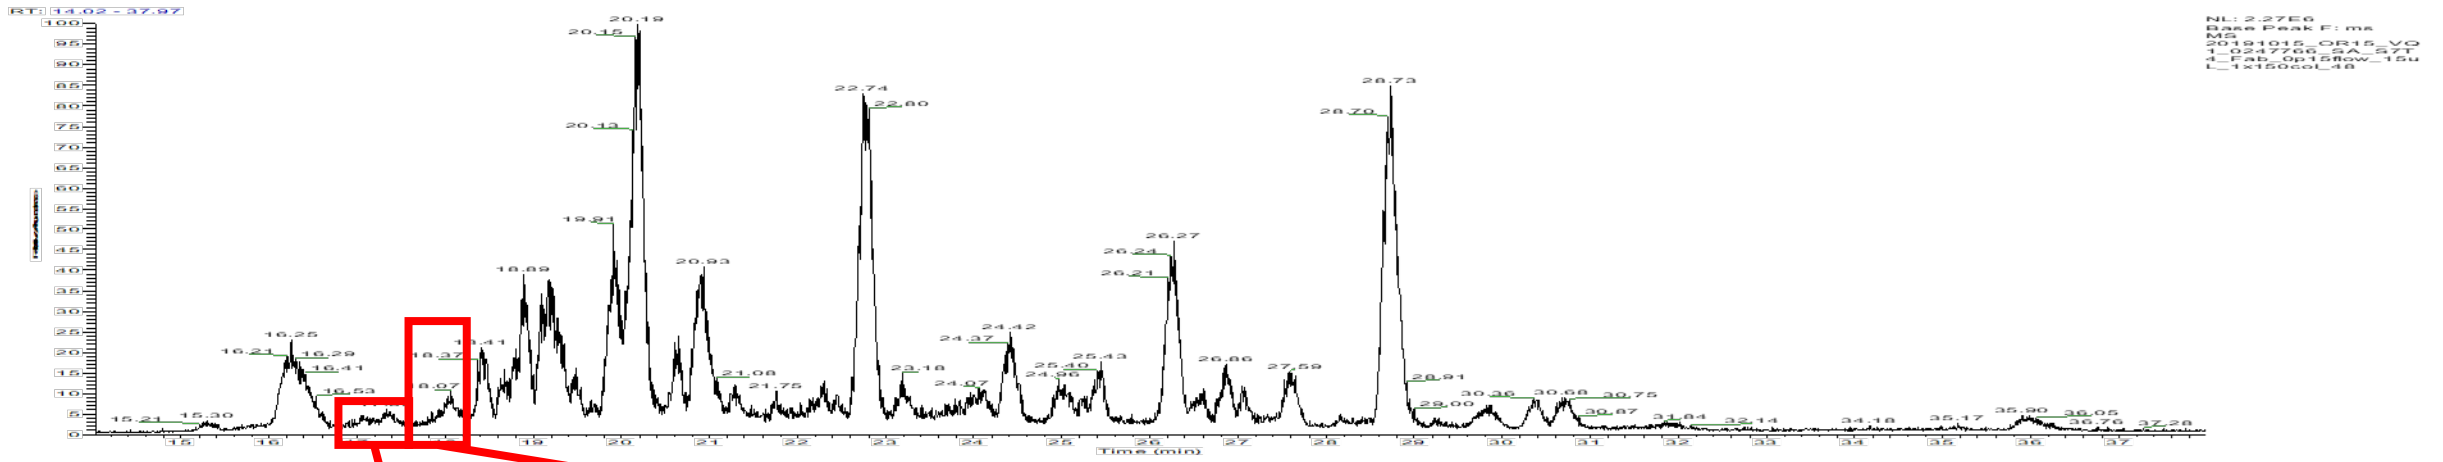

20191015\_OR15\_VQ1\_0247766\_SA\_S7T4\_Fab\_0p15flow\_15uL\_1x150col\_48 #2803-2937 RT: 16.90-17.60 AV: 135 NL: 2.65E4  
 T: FTMS + p ESI sid=15.00 Full ms [500.0000-3000.0000]

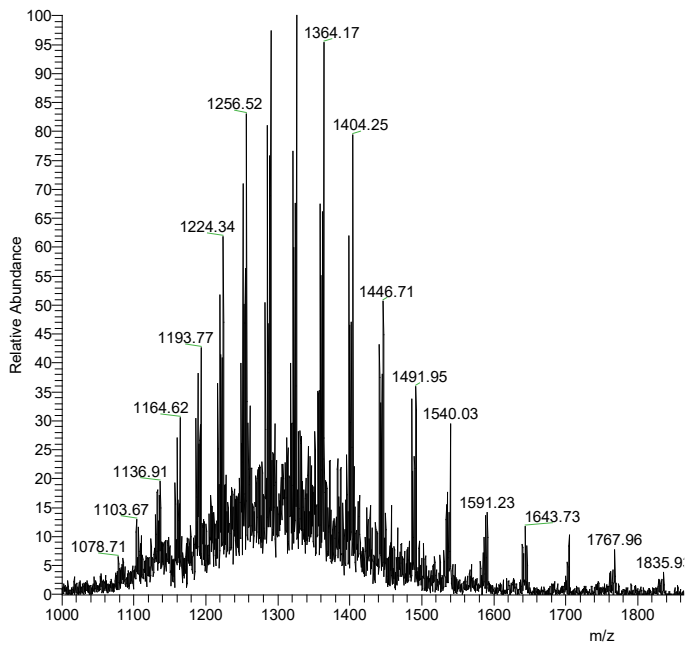

| Average_Mass | Apex_RT | Concentration |
|--------------|---------|---------------|
| 46545.6      | 17.34   | 1.92          |
| 46362.3      | 17.37   | 1.97          |
| 46997.1      | 17.37   | 0.62          |
| 47646.5      | 17.47   | 6.48          |
| 47799.5      | 17.57   | 0.52          |
| 47714.7      | 17.59   | 4.13          |
| 48535.5      | 17.59   | 0.70          |
| 47432.7      | 17.62   | 0.38          |
| 47468.5      | 17.69   | 0.62          |
| 47530.0      | 17.74   | 9.15          |
| 47708.8      | 17.77   | 8.05          |
| 47571.0      | 17.84   | 6.04          |
| 47416.8      | 17.84   | 4.78          |
| 47634.8      | 17.84   | 2.29          |
| 46962.1      | 17.92   | 0.54          |
| 51291.5      | 17.94   | 0.66          |

20191015\_OR15\_VQ1\_0247766\_SA\_S7T4\_Fab\_0p15flow\_15uL\_1x150col\_48 #2937-3074 RT: 17.60-18.30 AV: 138 NL: 5.65E4  
 T: FTMS + p ESI sid=15.00 Full ms [500.0000-3000.0000]

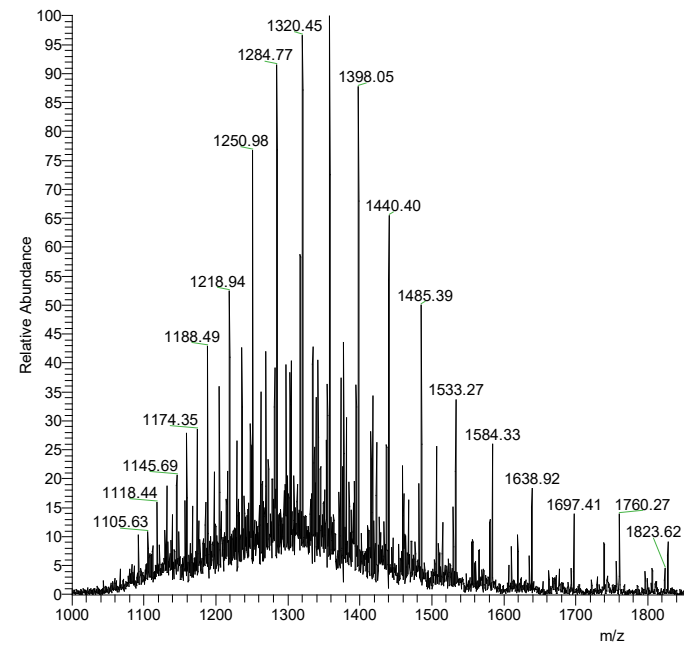

| Average_Mass | Apex_RT | Concentration |
|--------------|---------|---------------|
| 47117.0      | 18.04   | 0.54          |
| 47257.3      | 18.09   | 2.02          |
| 46590.6      | 18.09   | 1.74          |
| 47064.0      | 18.19   | 2.01          |
| 48701.9      | 18.27   | 3.52          |
| 47389.4      | 18.37   | 9.68          |
| 46758.7      | 18.37   | 1.97          |
| 47049.5      | 18.44   | 2.48          |
| 47943.2      | 18.44   | 1.76          |
| 47079.4      | 18.44   | 0.92          |
| 46933.3      | 18.49   | 10.48         |
| 48549.1      | 18.49   | 2.43          |
| 46743.2      | 18.49   | 0.89          |
| 48180.2      | 18.54   | 0.93          |
| 46800.7      | 18.59   | 2.61          |
| 48181.4      | 18.67   | 11.35         |
| 47632.8      | 18.69   | 1.23          |
| 47374.0      | 18.69   | 0.99          |

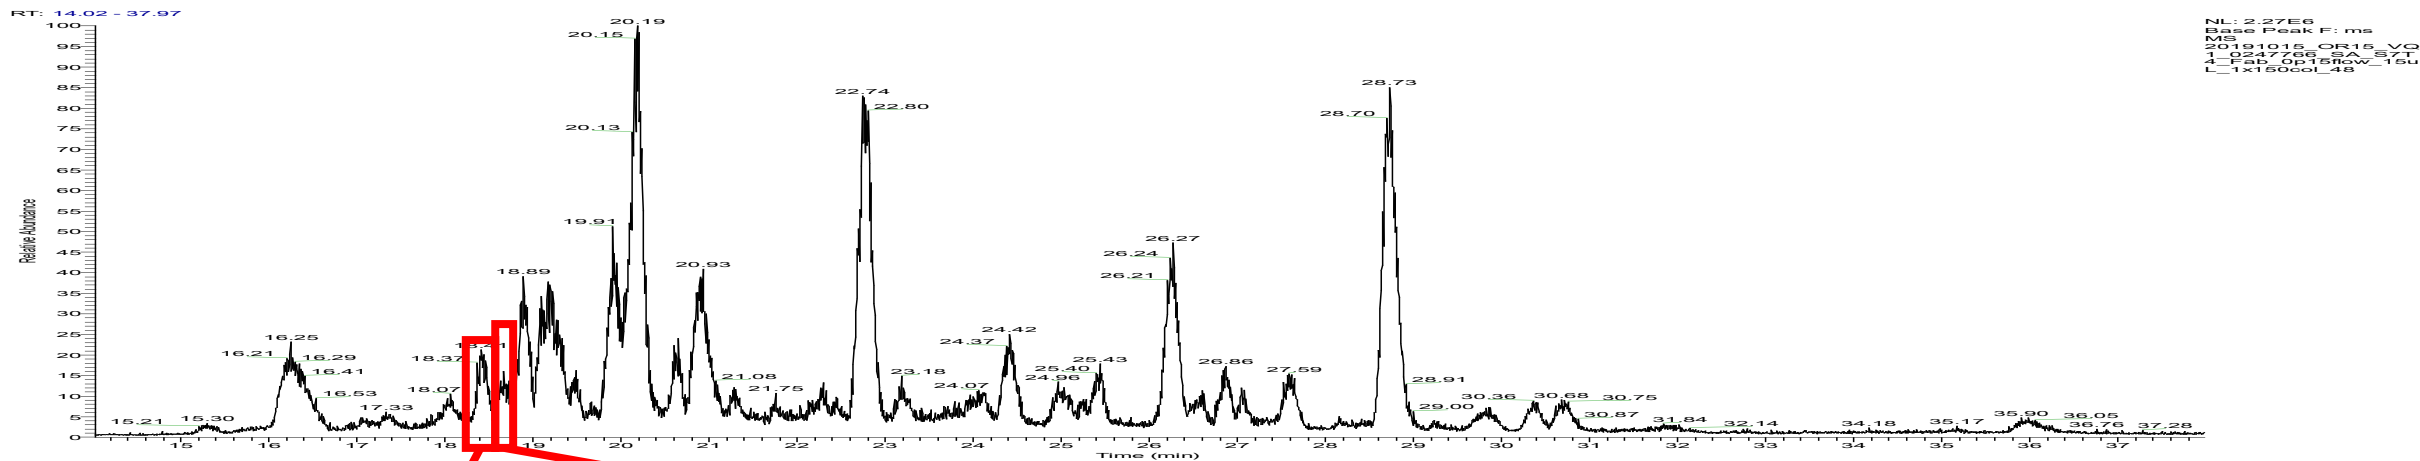

20191015\_OR15\_VQ1\_0247766\_SA\_S7T4\_Fab\_0p15flow\_15uL\_1x150col\_48 #3074-3138 RT: 18.30-18.60 AV: 65 NL: 1.83E5  
T: FTMS + p ESI sid=15.00 Full ms [500.0000-3000.0000]

| Average_Mass | Apex_RT | Concentration |
|--------------|---------|---------------|
| 46954.5      | 18.72   | 0.67          |
| 47053.6      | 18.74   | 1.66          |
| 46872.7      | 18.74   | 1.34          |
| 48685.7      | 18.82   | 40.66         |
| 48019.8      | 18.87   | 2.26          |
| 48600.5      | 18.92   | 2.09          |
| 47609.6      | 18.97   | 6.58          |
| 46657.5      | 18.99   | 1.34          |

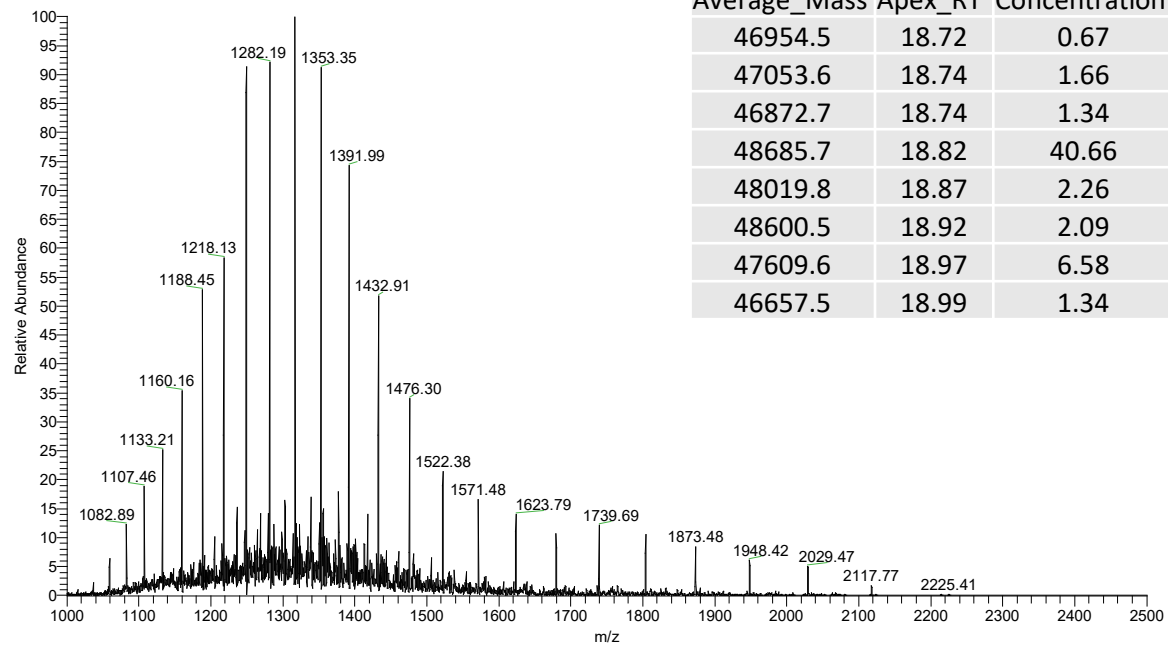

20191015\_OR15\_VQ1\_0247766\_SA\_S7T4\_Fab\_0p15flow\_15uL\_1x150col\_48 #3138-3160 RT: 18.60-18.70 AV: 23 NL: 1.97E5  
T: FTMS + p ESI sid=15.00 Full ms [500.0000-3000.0000]

| Average_Mass | Apex_RT | Concentration |
|--------------|---------|---------------|
| 47430.5      | 19.05   | 23.64         |
| 47707.7      | 19.05   | 3.42          |
| 47669.5      | 19.05   | 0.88          |
| 48042.7      | 19.05   | 0.83          |

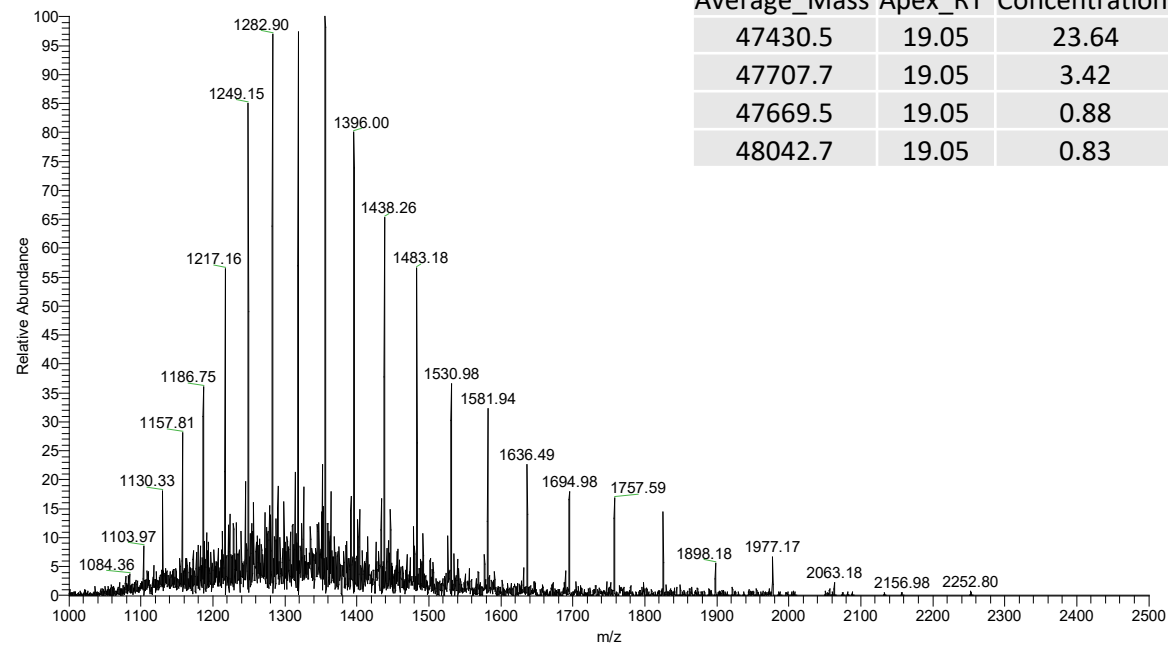

RT: 14.02 - 37.97

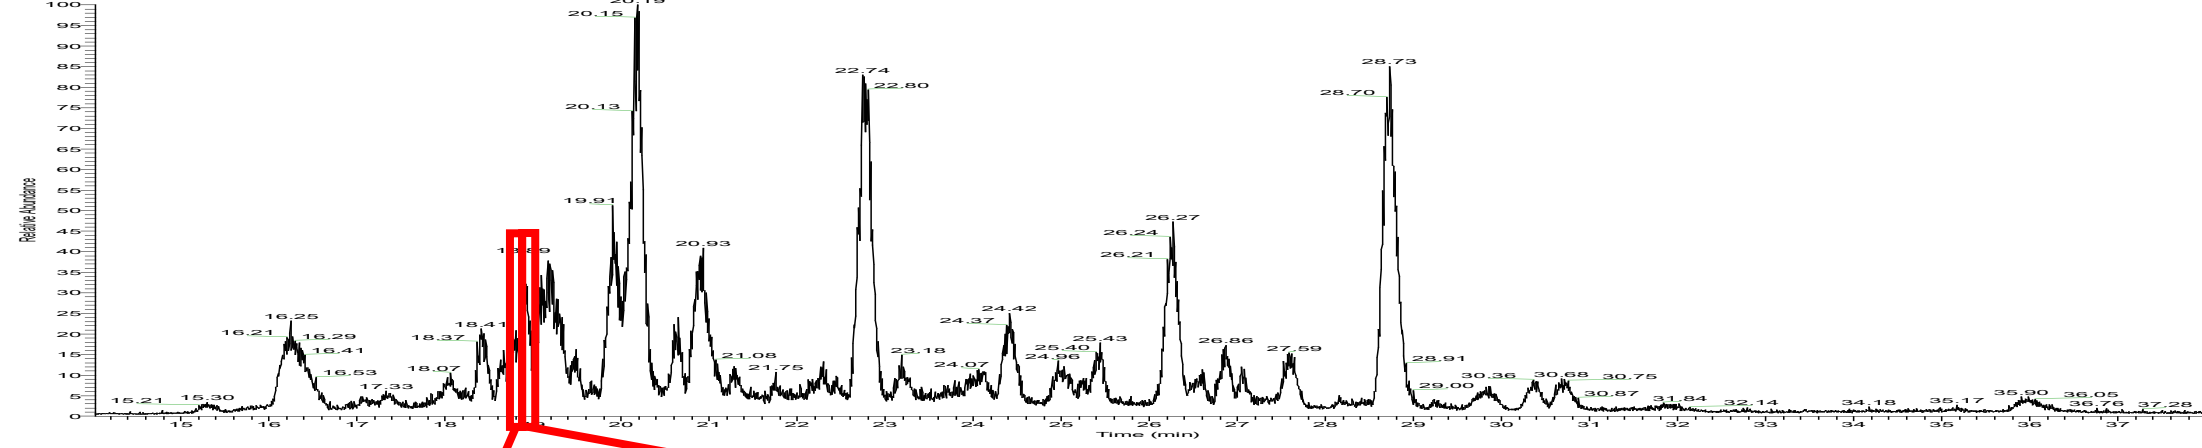

NL: 2.27E5  
 Base Peak F: ms  
 MS  
 20191015\_OR15\_VQ  
 1\_0247766\_SA\_S7T  
 1\_Fab\_0p15flow\_15uL  
 L\_1x150col\_48

20191015\_OR15\_VQ1\_0247766\_SA\_S7T4\_Fab\_0p15flow\_15uL\_1x150col\_48 #3160-3193 RT: 18.70-18.85 AV: 34 NL: 2.42E5  
 T: FTMS + p ESI sid=15.00 Full ms [500.0000-3000.0000]

| Average_Mass | Apex_RT | Concentration |
|--------------|---------|---------------|
| 48464.4      | 19.14   | 3.17          |
| 46940.3      | 19.14   | 1.16          |
| 47242.3      | 19.14   | 0.71          |
| 47287.4      | 19.19   | 37.53         |
| 47542.9      | 19.24   | 3.49          |
| 47689.3      | 19.24   | 3.10          |

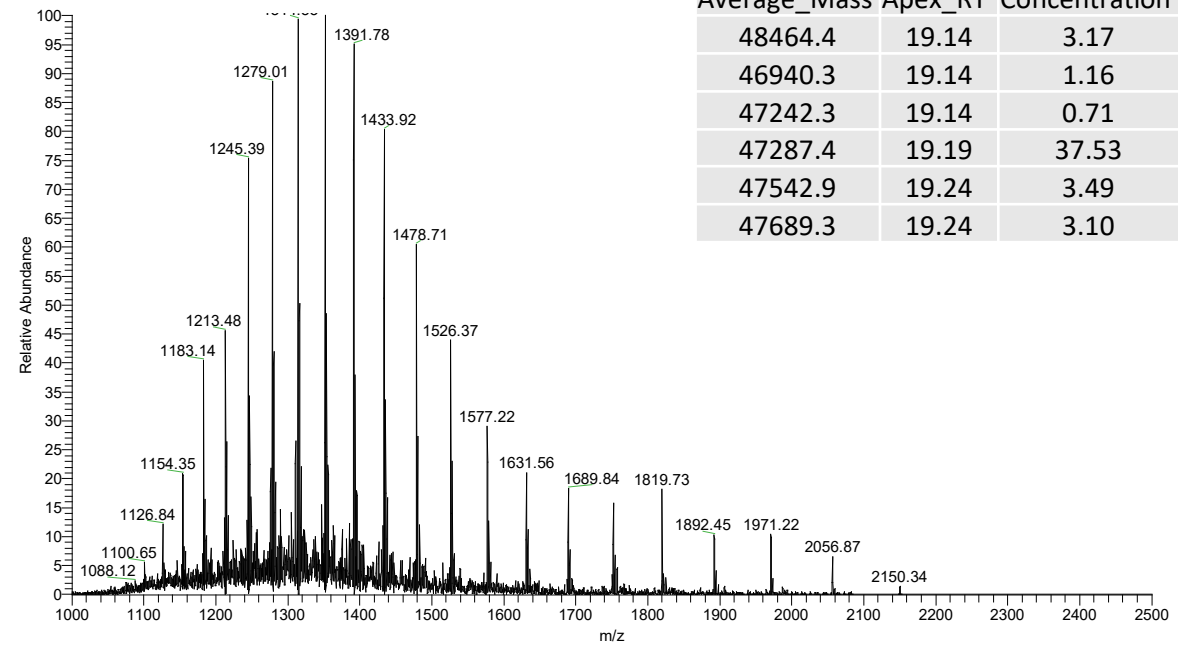

20191015\_OR15\_VQ1\_0247766\_SA\_S7T4\_Fab\_0p15flow\_15uL\_1x150col\_48 #3193-3227 RT: 18.85-19.00 AV: 35 NL: 5.06E5  
 T: FTMS + p ESI sid=15.00 Full ms [500.0000-3000.0000]

| Average_Mass | Apex_RT | Concentration |
|--------------|---------|---------------|
| 47347.2      | 19.29   | 72.56         |
| 48112.7      | 19.29   | 7.48          |
| 47249.5      | 19.29   | 5.56          |
| 47760.6      | 19.32   | 2.72          |
| 47397.3      | 19.32   | 1.45          |
| 47604.3      | 19.37   | 1.78          |
| 47848.2      | 19.37   | 1.00          |

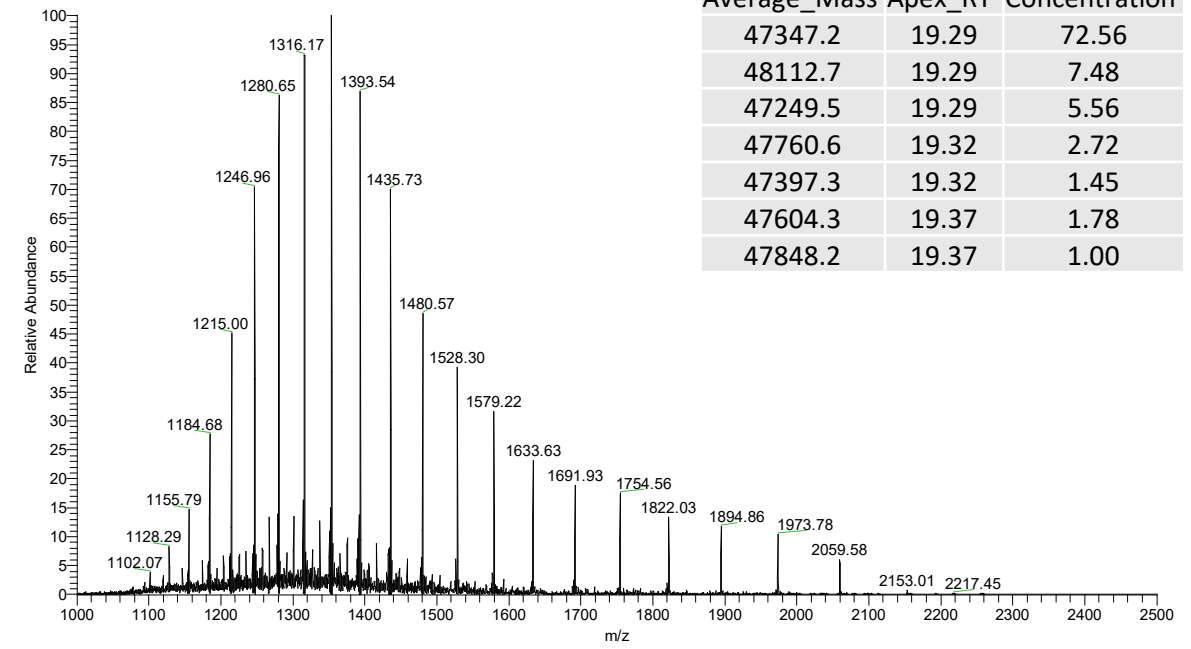

RT: 14.02 - 37.97

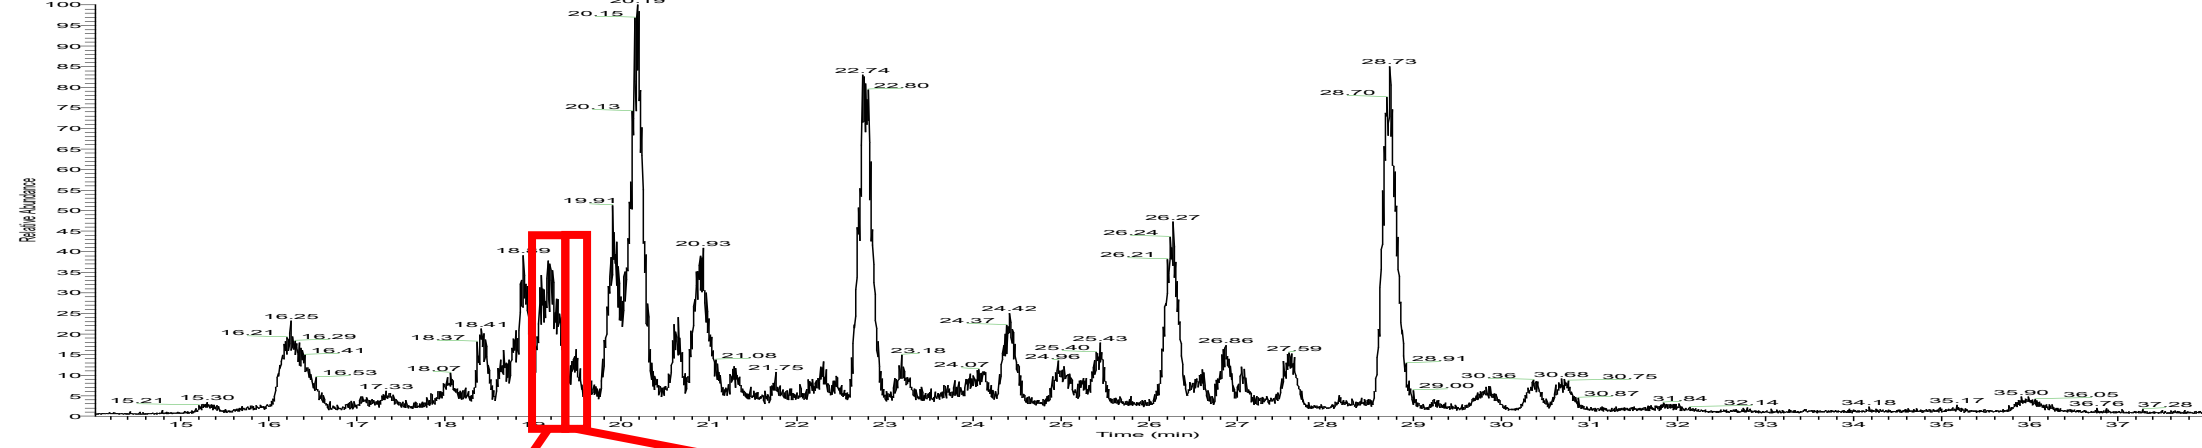

NL: 2.27E6  
 Base Peak F: ms  
 MS  
 20191015\_OR15\_VQ  
 1\_0247766\_SA\_S7T  
 1\_Fab\_0p15flow\_15u  
 L\_1x150col\_48

20191015\_OR15\_VQ1\_0247766\_SA\_S7T4\_Fab\_0p15flow\_15uL\_1x150col\_48 #3227-3296 RT: 19.00-19.30 AV: 70 NL: 3.45E5  
 T: FTMS + p ESI sid=15.00 Full ms [500.0000-3000.0000]

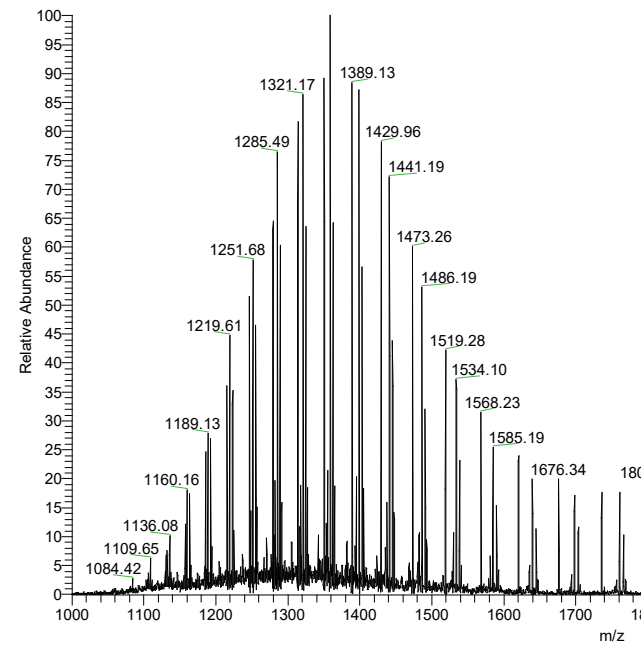

Average\_Mass Apex\_RT Concentration

|         |       |       |
|---------|-------|-------|
| 46879.2 | 19.44 | 1.34  |
| 47405.1 | 19.47 | 15.81 |
| 47746.4 | 19.47 | 14.49 |
| 48486.2 | 19.47 | 0.90  |
| 48585.4 | 19.52 | 77.15 |
| 47006.9 | 19.57 | 1.47  |
| 47526.4 | 19.59 | 82.22 |
| 46958.0 | 19.62 | 6.73  |
| 47576.8 | 19.62 | 1.65  |
| 47673.5 | 19.67 | 85.99 |
| 47454.0 | 19.67 | 3.62  |

20191015\_OR15\_VQ1\_0247766\_SA\_S7T4\_Fab\_0p15flow\_15uL\_1x150col\_48 #3296-3364 RT: 19.30-19.60 AV: 69 NL: 1.56E5  
 T: FTMS + p ESI sid=15.00 Full ms [500.0000-3000.0000]

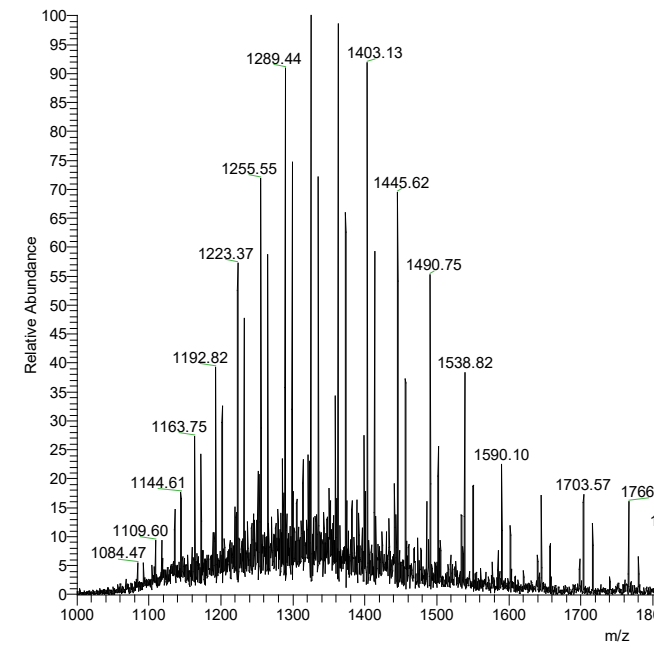

Average\_Mass Apex\_RT Concentration

|         |       |       |
|---------|-------|-------|
| 47789.8 | 19.72 | 1.63  |
| 47573.0 | 19.72 | 0.88  |
| 47189.0 | 19.74 | 0.85  |
| 47276.4 | 19.77 | 3.31  |
| 46618.1 | 19.84 | 1.67  |
| 47754.7 | 19.84 | 0.67  |
| 48032.0 | 19.87 | 23.23 |
| 47591.9 | 19.89 | 4.76  |
| 48081.7 | 19.99 | 4.78  |

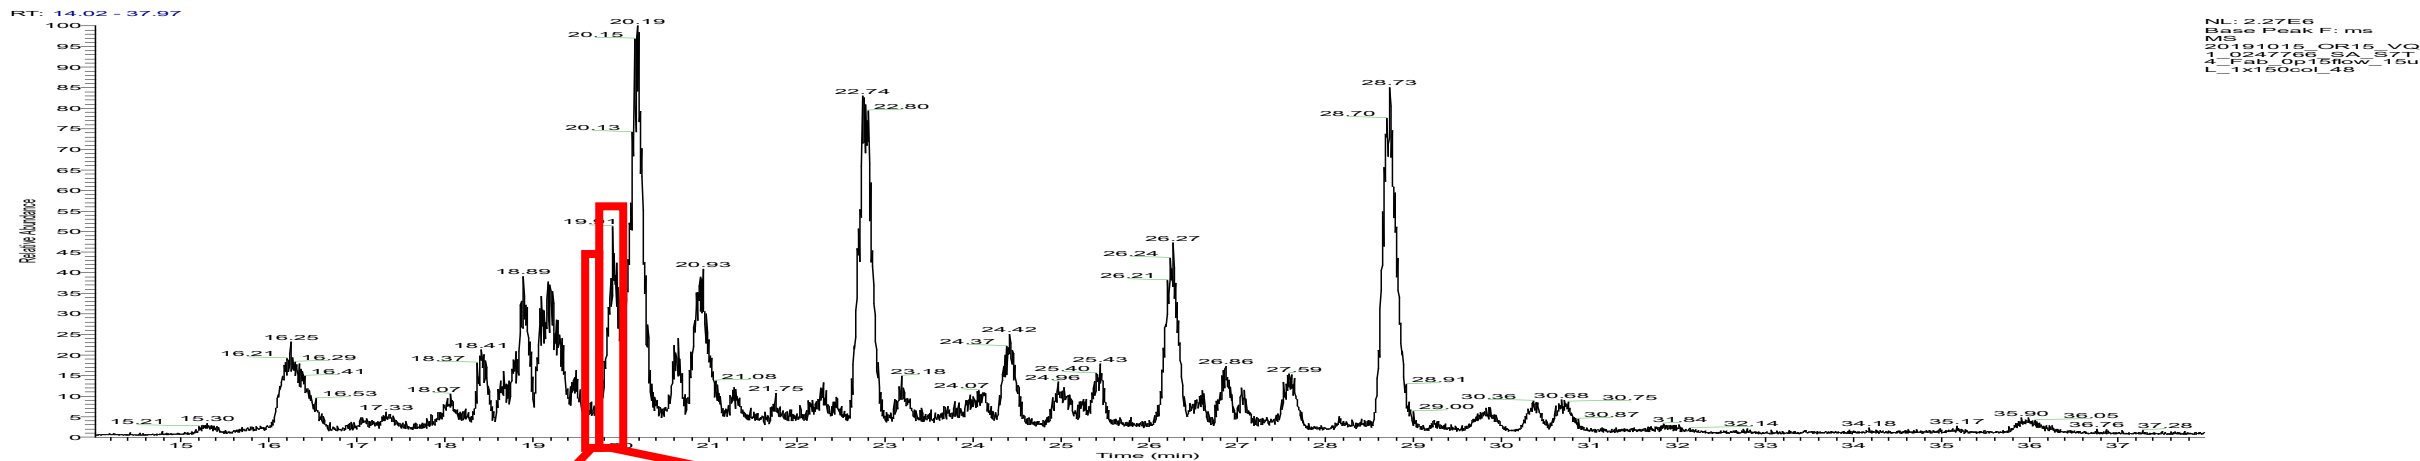

20191015\_OR15\_VQ1\_0247766\_SA\_S7T4\_Fab\_0p15flow\_15uL\_1x150col\_48 #3364-3397 RT: 19.60-19.75 AV: 34 NL: 7.92E4  
T: FTMS + p ESI sid=15.00 Full ms [500.0000-3000.0000]

| Average_Mass | Apex_RT | Concentration |
|--------------|---------|---------------|
| 48007.6      | 20.07   | 9.47          |
| 48109.3      | 20.07   | 1.17          |
| 46934.4      | 20.09   | 5.14          |

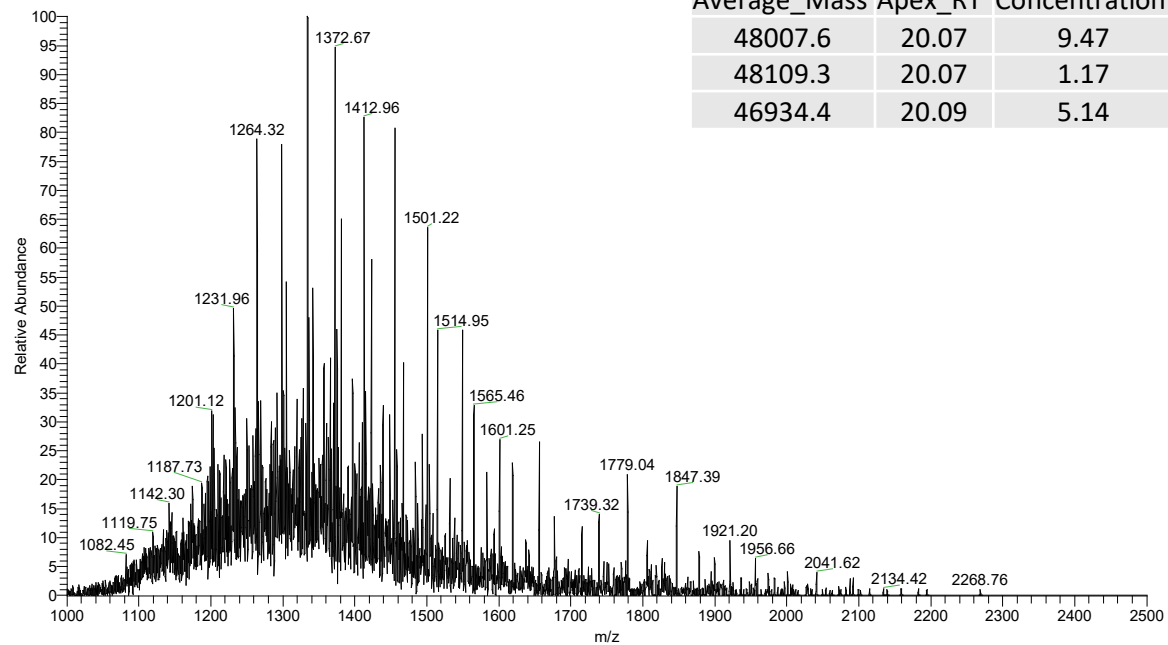

20191015\_OR15\_VQ1\_0247766\_SA\_S7T4\_Fab\_0p15flow\_15uL\_1x150col\_48 #3397-3454 RT: 19.75-20.00 AV: 58 NL: 5.10E5  
T: FTMS + p ESI sid=15.00 Full ms [500.0000-3000.0000]

| Average_Mass | Apex_RT | Concentration |
|--------------|---------|---------------|
| 47934.2      | 20.17   | 2.83          |
| 47472.1      | 20.19   | 10.49         |
| 47254.6      | 20.19   | 1.19          |
| 47585.6      | 20.32   | 121.54        |
| 47423.6      | 20.32   | 1.75          |
| 47483.5      | 20.34   | 1.46          |
| 47537.1      | 20.34   | 0.52          |
| 47913.9      | 20.37   | 6.24          |

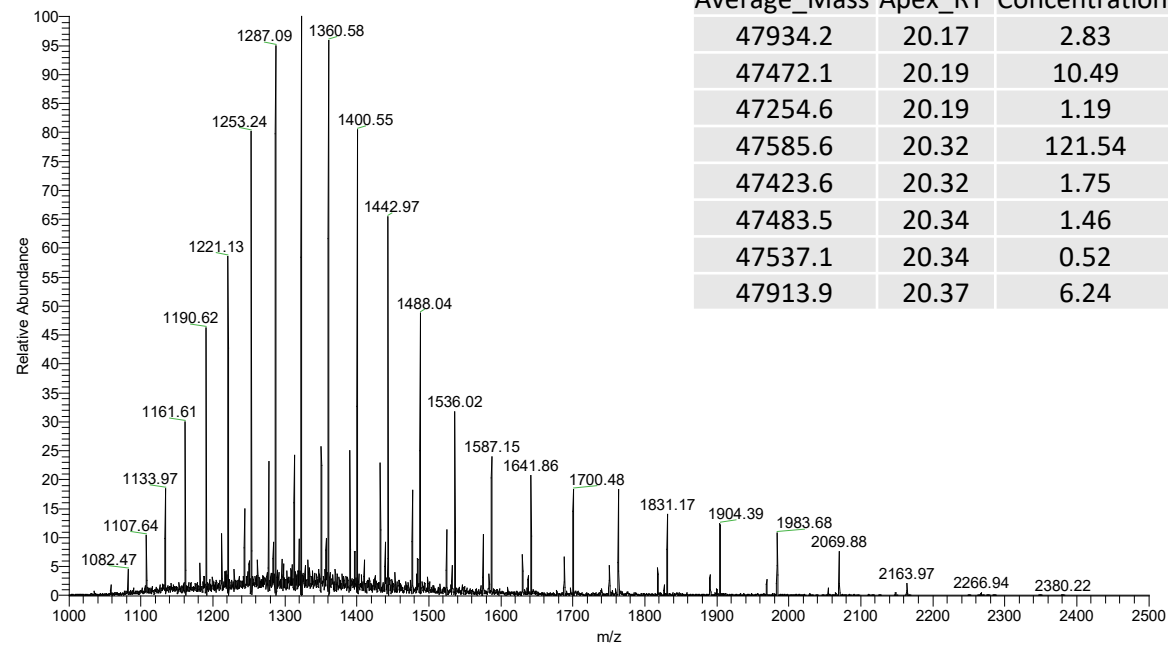



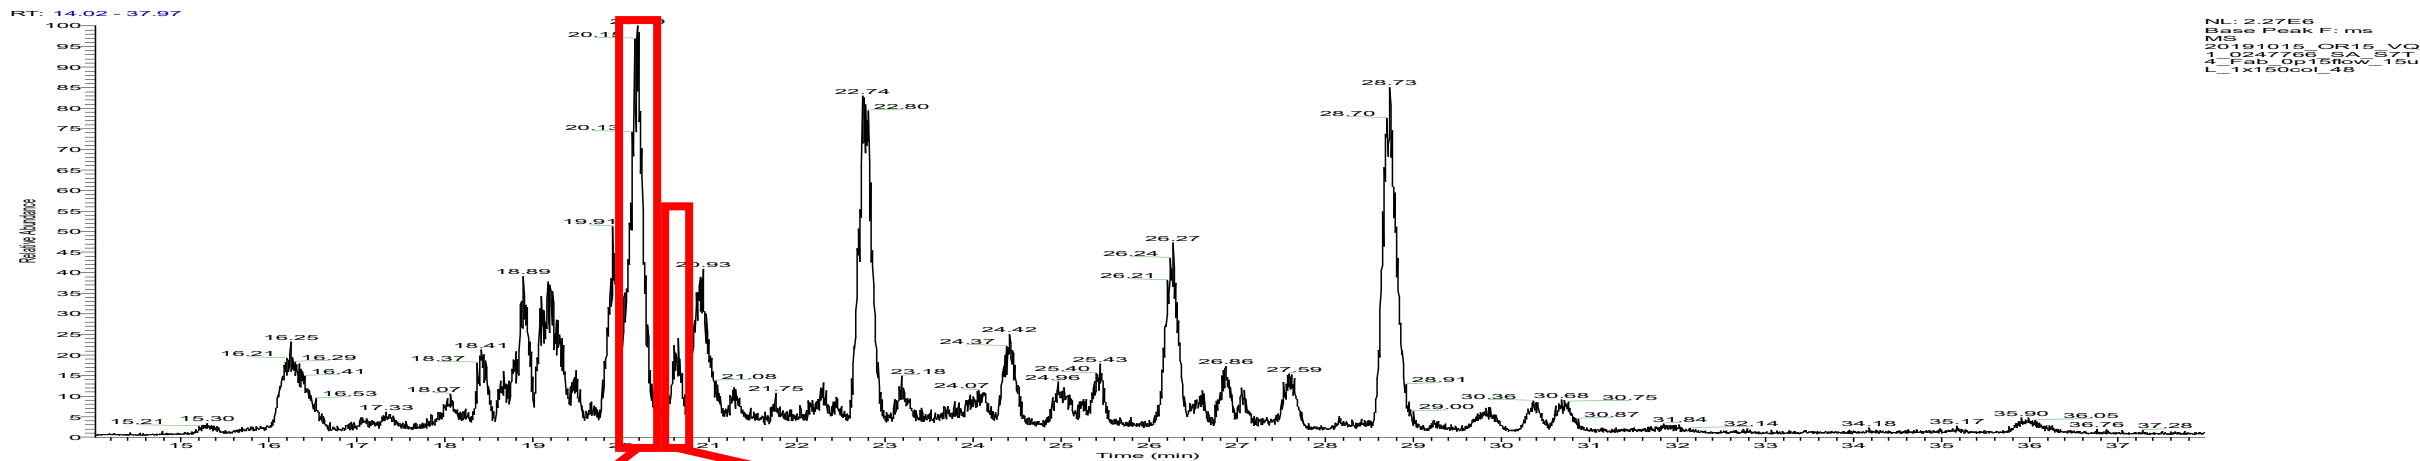

20191015\_OR15\_VQ1\_0247766\_SA\_S7T4\_Fab\_0p15flow\_15uL\_1x150col\_48 #3454-3548 RT: 20.00-20.40 AV: 95 NL: 8.82E5  
T: FTMS + p ESI sid=15.00 Full ms [500.0000-3000.0000]

RT: 20.00-20.40 AV: 95 NL: 8.82E5

| Average_Mass | Apex_RT | Concentration |
|--------------|---------|---------------|
| 48620.1      | 20.47   | 12.47         |
| 48236.5      | 20.49   | 1.64          |
| 48103.5      | 20.49   | 1.15          |
| 47238.0      | 20.57   | 444.51        |
| 47137.4      | 20.57   | 20.20         |
| 47093.5      | 20.57   | 2.60          |
| 47342.5      | 20.62   | 12.96         |
| 47459.3      | 20.62   | 6.93          |
| 47185.8      | 20.62   | 3.17          |
| 46765.1      | 20.72   | 2.45          |
| 47778.6      | 20.77   | 7.05          |
| 46622.0      | 20.77   | 2.29          |
| 48032.3      | 20.79   | 9.79          |
| 46524.0      | 20.79   | 5.91          |
| 48141.3      | 20.79   | 3.33          |
| 48392.4      | 20.79   | 3.30          |

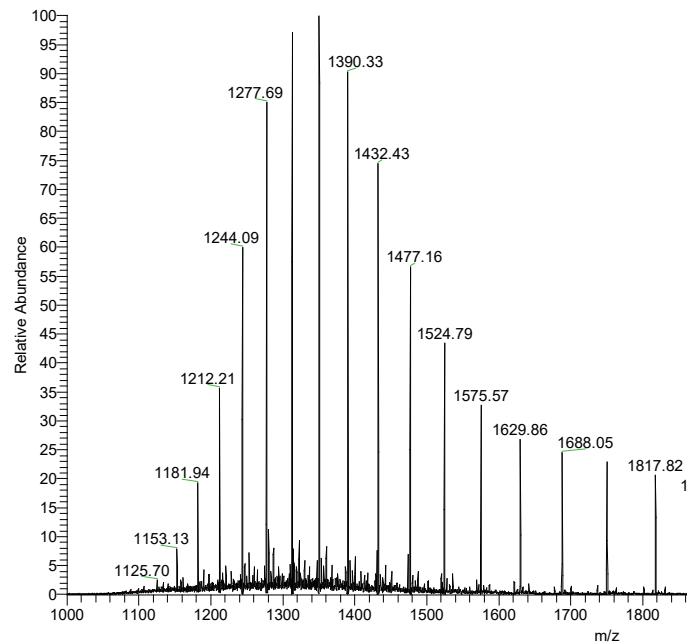

20191015\_OR15\_VQ1\_0247766\_SA\_S7T4\_Fab\_0p15flow\_15uL\_1x150col\_48 #3548-3629 RT: 20.40-20.75 AV: 82 NL: 1.63E5  
T: FTMS + p ESI sid=15.00 Full ms [500.0000-3000.0000]

RT: 20.40-20.75 AV: 82 NL: 1.63E5

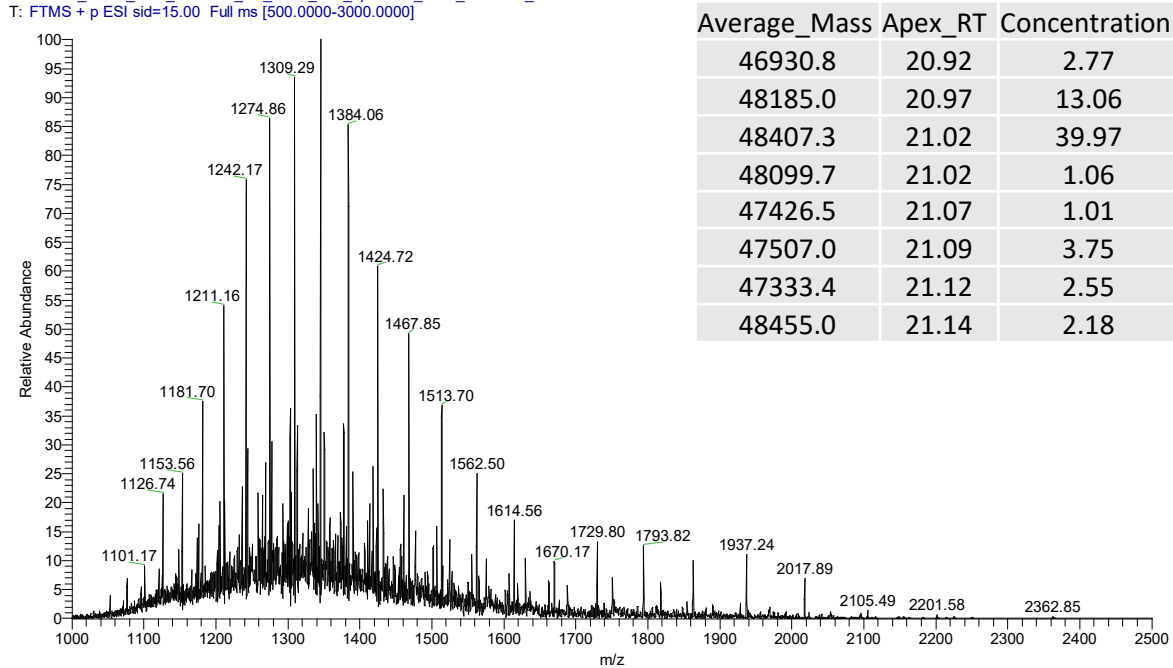

RT: 14.02 - 37.97

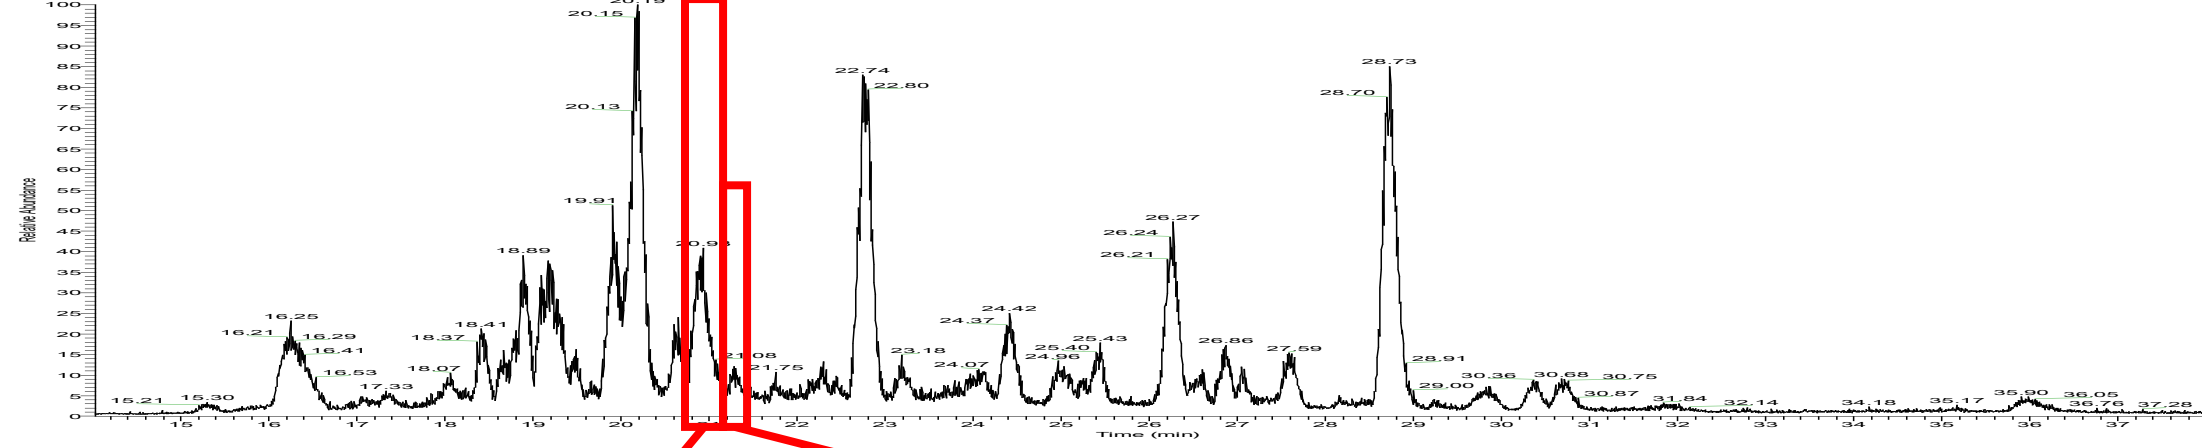

NL: 2.27E6  
 Base Peak F: ms  
 MS  
 20191015\_OR15\_VQ  
 1\_0247766\_SA\_S7T  
 1\_Fab\_0p15flow\_15u  
 L\_1x150col\_48

20191015\_OR15\_VQ1\_0247766\_SA\_S7T4\_Fab\_0p15flow\_15uL\_1x150col\_48 #3629-3732 RT: 20.75-21.20 AV: 104 NL: 3.48E5  
 T: FTMS + p ESI sid=15.00 Full ms [500.0000-3000.0000]

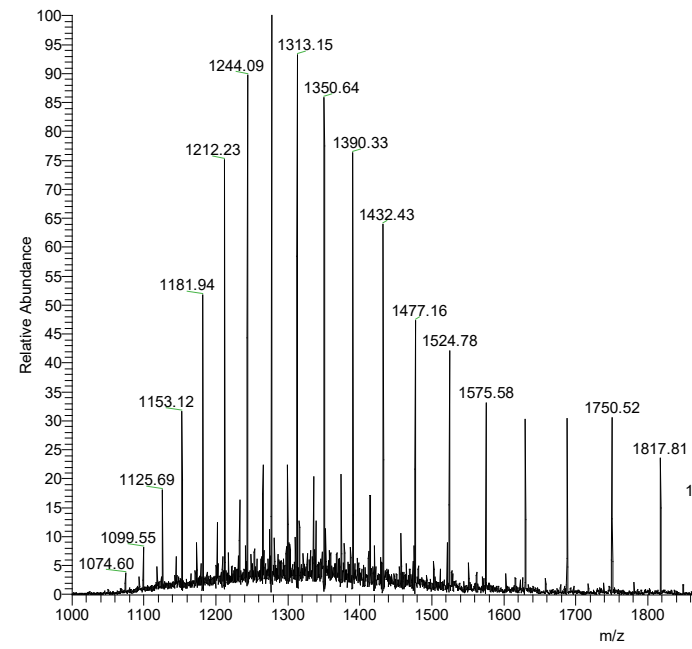

| Average_Mass | Apex_RT | Concentration |
|--------------|---------|---------------|
| 47984.2      | 21.22   | 4.08          |
| 47540.5      | 21.22   | 0.63          |
| 46840.9      | 21.24   | 6.73          |
| 48083.2      | 21.29   | 4.06          |
| 48055.8      | 21.44   | 23.11         |
| 48661.0      | 21.47   | 8.73          |
| 48116.9      | 21.49   | 0.87          |
| 47744.5      | 21.52   | 1.19          |
| 46783.9      | 21.54   | 2.84          |
| 47903.4      | 21.54   | 0.88          |
| 47261.2      | 21.57   | 1.03          |
| 48855.9      | 21.59   | 7.01          |

20191015\_OR15\_VQ1\_0247766\_SA\_S7T4\_Fab\_0p15flow\_15uL\_1x150col\_48 #3732-3776 RT: 21.20-21.40 AV: 45 NL: 1.21E5  
 T: FTMS + p ESI sid=15.00 Full ms [500.0000-3000.0000]

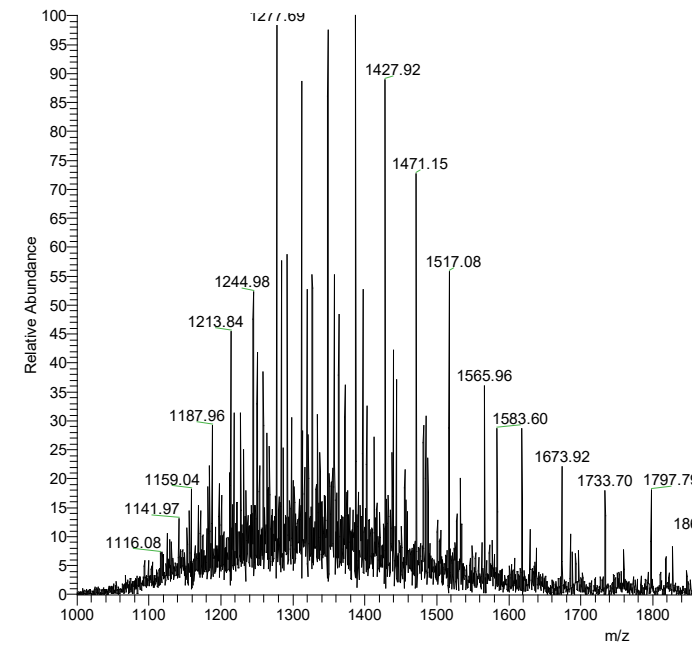

| Average_Mass | Apex_RT | Concentration |
|--------------|---------|---------------|
| 47996.0      | 21.64   | 5.39          |
| 48515.4      | 21.69   | 19.29         |
| 49060.8      | 21.69   | 8.49          |
| 47479.1      | 21.72   | 16.67         |

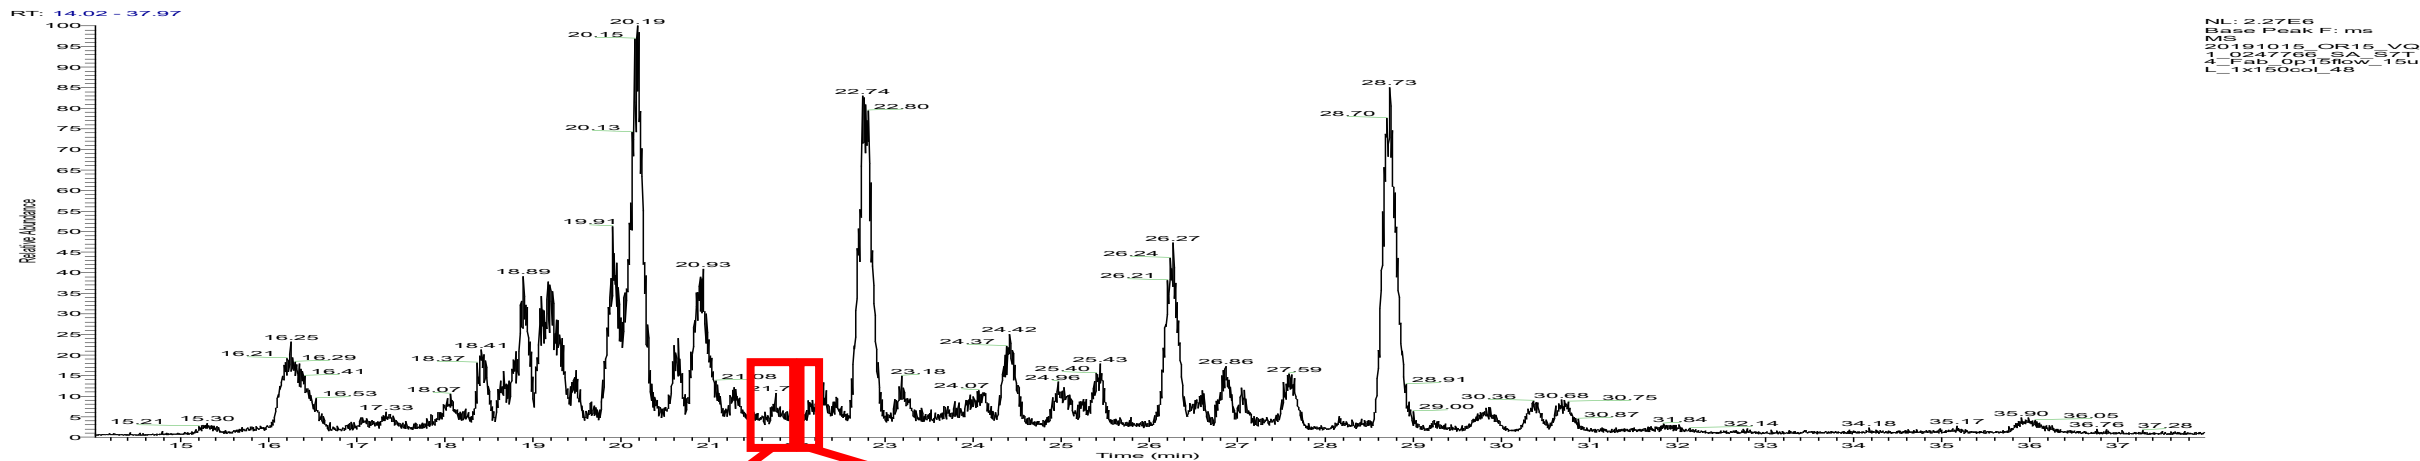

20191015\_OR15\_VQ1\_0247766\_SA\_S7T4\_Fab\_0p15flow\_15uL\_1x150col\_48 #3776-3896 RT: 21.40-21.95 AV: 121 NL: 4.05E4  
T: FTMS + p ESI sid=15.00 Full ms [500.0000-3000.0000]

| Average_Mass | Apex_RT | Concentration |
|--------------|---------|---------------|
| 48128.4      | 21.82   | 4.22          |
| 46599.0      | 21.87   | 8.84          |
| 47339.9      | 21.94   | 20.82         |
| 46821.9      | 21.99   | 4.14          |
| 46709.0      | 21.99   | 1.52          |
| 47176.8      | 22.09   | 0.77          |
| 47827.4      | 22.14   | 17.29         |
| 48250.3      | 22.17   | 1.17          |
| 48112.8      | 22.19   | 2.75          |
| 48255.4      | 22.27   | 2.78          |
| 47191.9      | 22.29   | 5.35          |

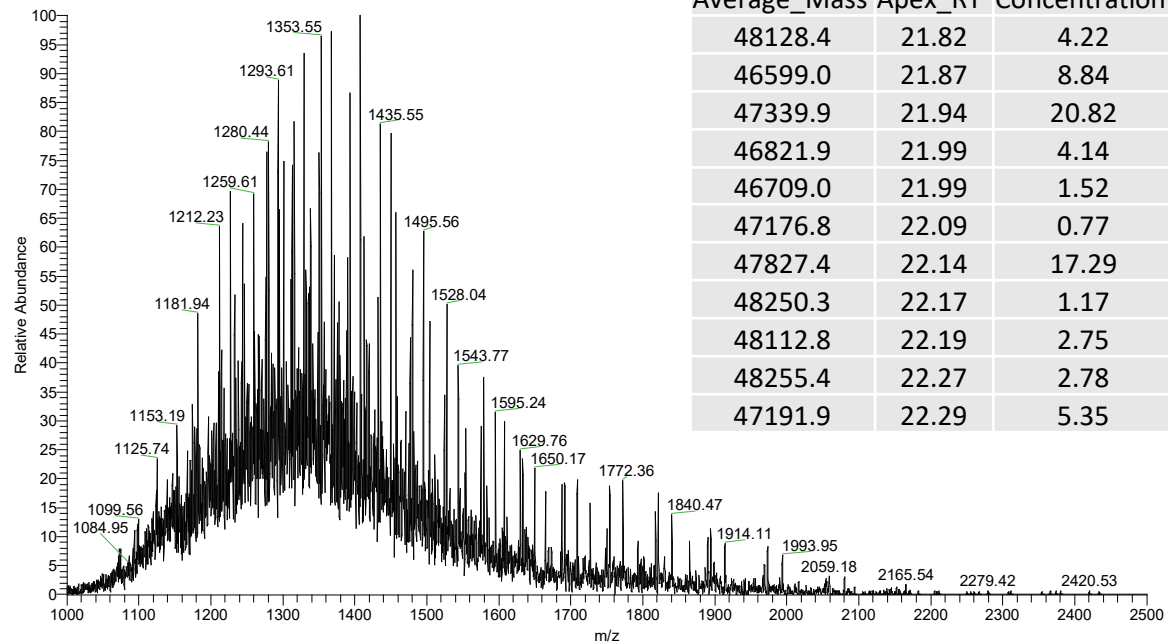

20191015\_OR15\_VQ1\_0247766\_SA\_S7T4\_Fab\_0p15flow\_15uL\_1x150col\_48 #3896-3953 RT: 21.95-22.20 AV: 58 NL: 5.26E4  
T: FTMS + p ESI sid=15.00 Full ms [500.0000-3000.0000]

| Average_Mass | Apex_RT | Concentration |
|--------------|---------|---------------|
| 47663.5      | 22.39   | 2.57          |
| 47346.0      | 22.39   | 1.82          |
| 46753.1      | 22.49   | 1.05          |
| 47421.9      | 22.57   | 12.98         |
| 47236.2      | 22.57   | 5.07          |
| 48139.5      | 22.57   | 3.57          |
| 47311.1      | 22.59   | 4.79          |

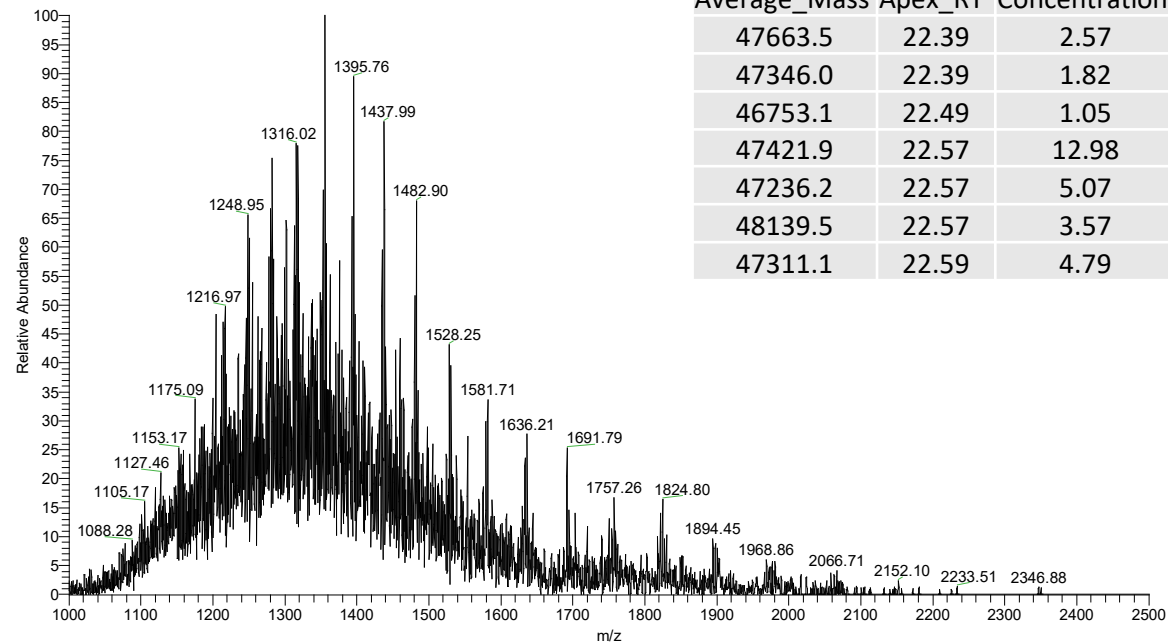

RT: 14.02 - 37.97

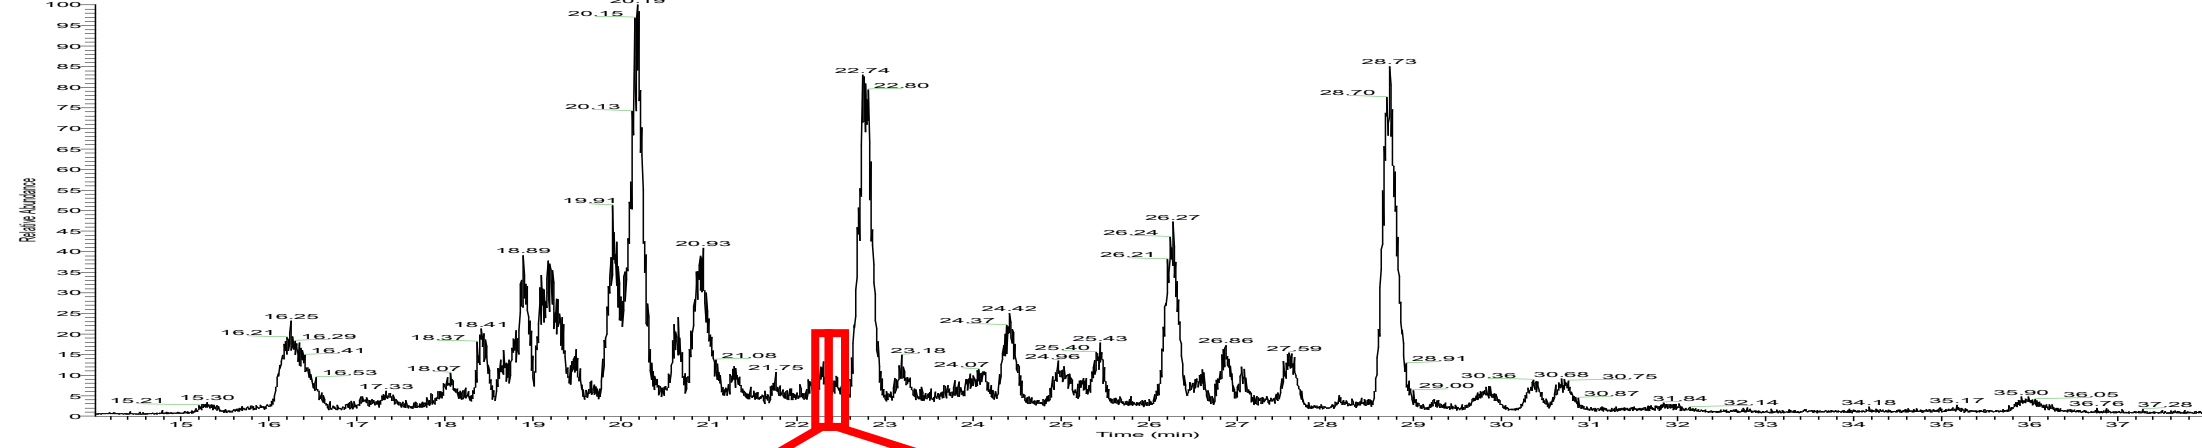

NL: 2.27E6  
 Base Peak F: ms  
 MS  
 20191015\_OR15\_V0  
 1\_0247766\_SA\_S7T  
 L\_Fab\_0p15flow\_15u  
 L\_1x150col\_48

20191015\_OR15\_VQ1\_0247766\_SA\_S7T4\_Fab\_0p15flow\_15uL\_1x150col\_48 #3953-3999 RT: 22.20-22.40 AV: 47 NL: 9.39E4  
 T: FTMS + p ESI sid=15.00 Full ms [500.0000-3000.0000]

| Average_Mass | Apex_RT | Concentration |
|--------------|---------|---------------|
| 47943.8      | 22.62   | 4.75          |
| 47897.3      | 22.62   | 1.65          |
| 47548.8      | 22.67   | 3.93          |
| 48168.2      | 22.69   | 13.55         |
| 48098.5      | 22.69   | 10.82         |
| 48041.3      | 22.69   | 6.14          |
| 47799.4      | 22.69   | 1.53          |
| 47414.1      | 22.72   | 4.44          |
| 47210.8      | 22.72   | 1.96          |
| 46706.2      | 22.77   | 1.80          |

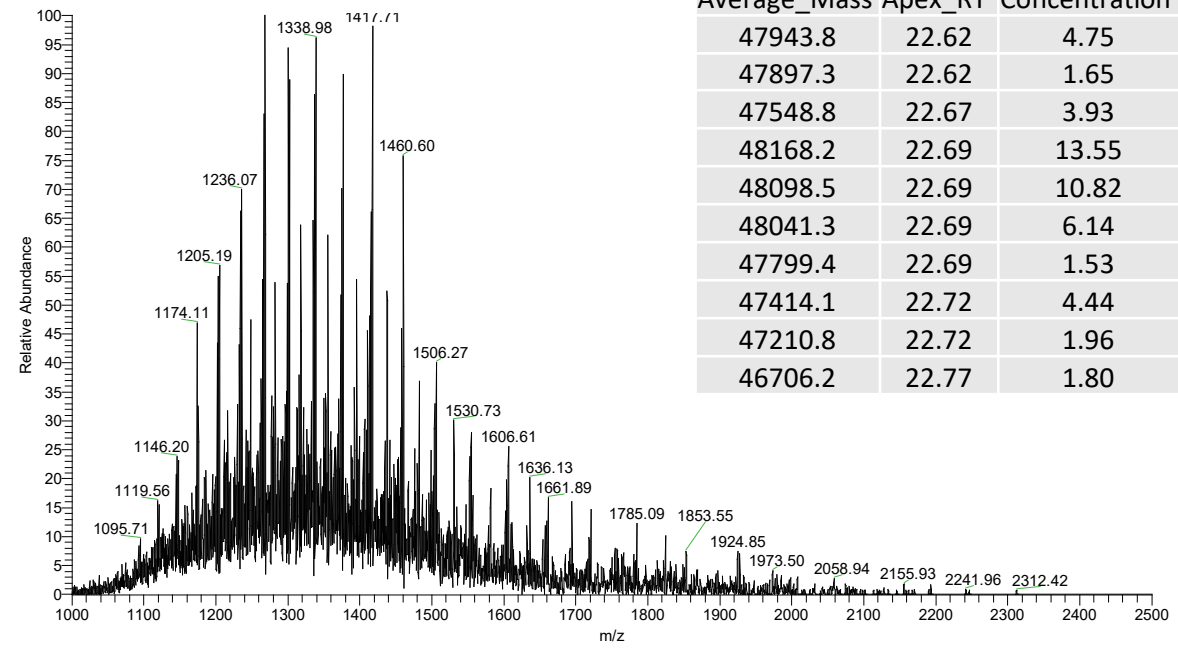

20191015\_OR15\_VQ1\_0247766\_SA\_S7T4\_Fab\_0p15flow\_15uL\_1x150col\_48 #3999-4043 RT: 22.40-22.60 AV: 45 NL: 8.42E4  
 T: FTMS + p ESI sid=15.00 Full ms [500.0000-3000.0000]

| Average_Mass | Apex_RT | Concentration |
|--------------|---------|---------------|
| 46674.9      | 22.84   | 11.94         |
| 47726.5      | 22.84   | 4.72          |
| 46607.9      | 22.94   | 2.97          |

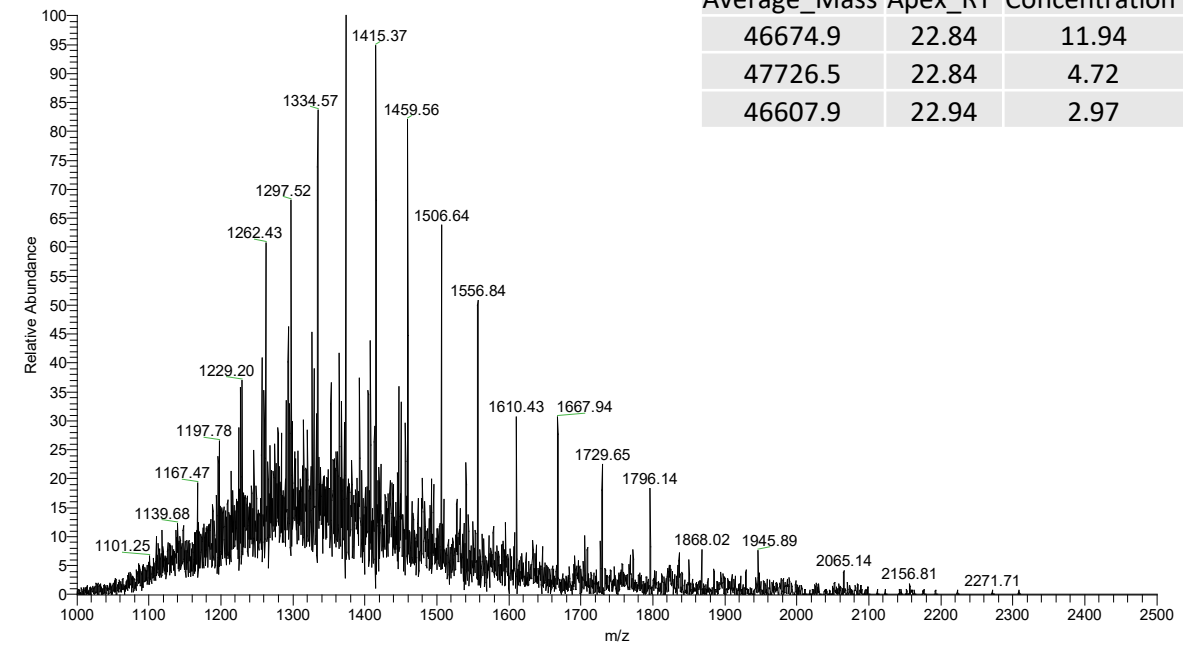

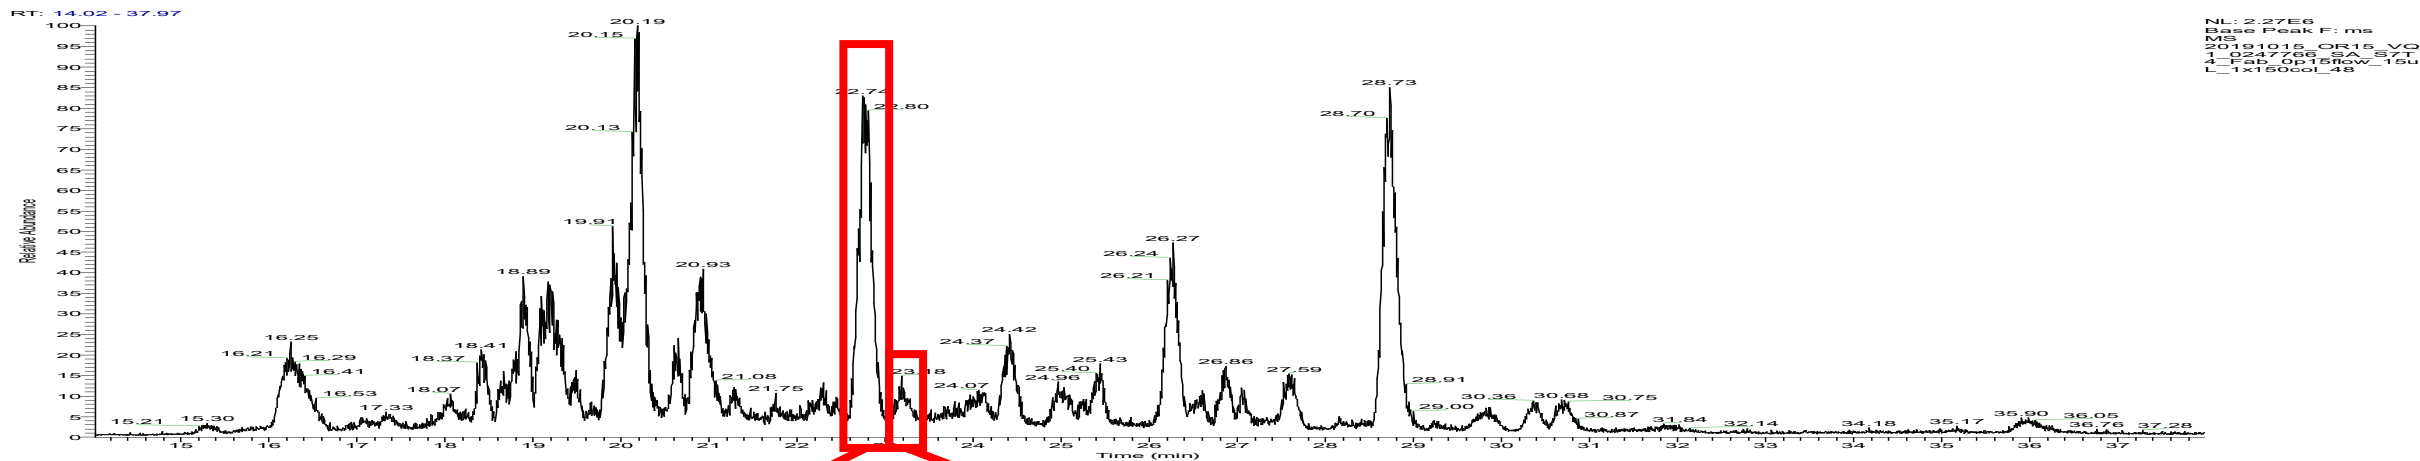

20191015\_OR15\_VQ1\_0247766\_SA\_S7T4\_Fab\_0p15flow\_15uL\_1x150col\_48 #4043-4137

RT: 22.60-23.00 AV: 95 NL: 7.54E5

T: FTMS + p ESI sid=15.00 Full ms [500.0000-3000.0000]

Average\_Mass Apex\_RT Concentration

|         |       |        |
|---------|-------|--------|
| 46912.5 | 23.04 | 1.49   |
| 47185.7 | 23.04 | 0.98   |
| 47328.2 | 23.17 | 235.71 |
| 47227.7 | 23.17 | 8.19   |
| 47576.0 | 23.17 | 1.52   |
| 47379.5 | 23.19 | 7.57   |
| 48236.4 | 23.19 | 1.65   |
| 47852.5 | 23.24 | 5.99   |
| 47925.7 | 23.29 | 3.98   |
| 47571.4 | 23.37 | 2.58   |

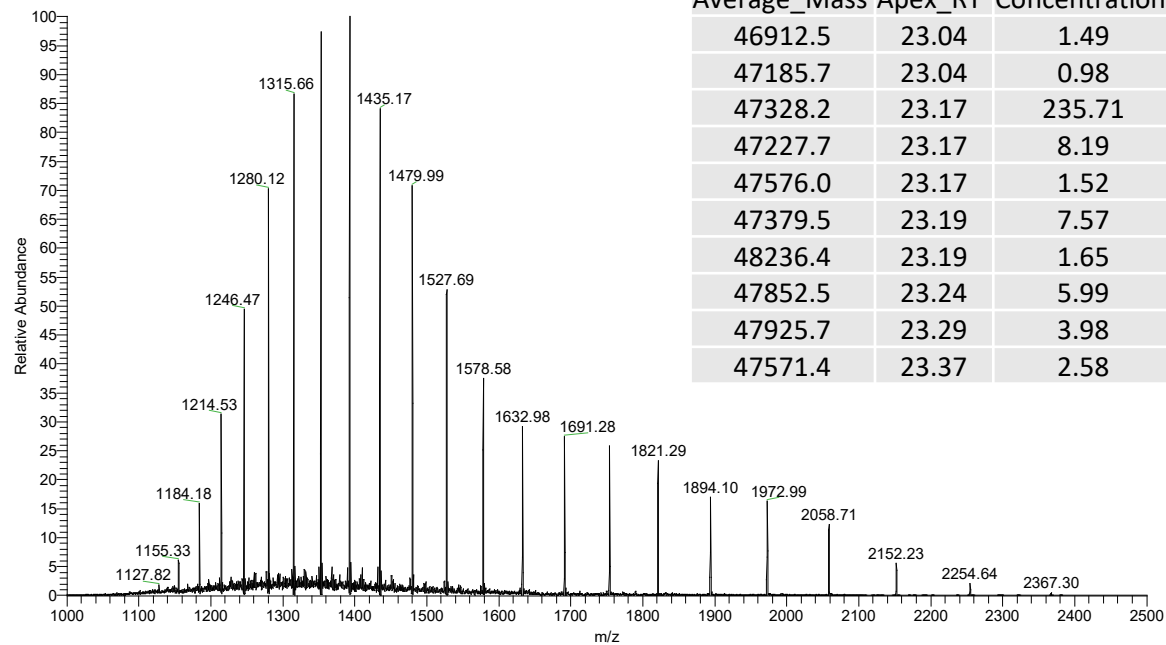

20191015\_OR15\_VQ1\_0247766\_SA\_S7T4\_Fab\_0p15flow\_15uL\_1x150col\_48 #4137-4225

RT: 23.00-23.40 AV: 89 NL: 1.00E5

T: FTMS + p ESI sid=15.00 Full ms [500.0000-3000.0000]

Average\_Mass Apex\_RT Concentration

|         |       |       |
|---------|-------|-------|
| 47005.5 | 23.44 | 3.39  |
| 46510.3 | 23.44 | 2.54  |
| 47501.9 | 23.47 | 6.06  |
| 49445.3 | 23.52 | 2.28  |
| 50285.0 | 23.54 | 0.73  |
| 47782.7 | 23.59 | 29.46 |
| 47306.0 | 23.59 | 1.09  |
| 47102.9 | 23.64 | 9.12  |
| 47648.0 | 23.64 | 4.66  |
| 47235.0 | 23.67 | 1.76  |
| 47368.7 | 23.67 | 1.46  |
| 48316.2 | 23.67 | 1.34  |
| 47497.3 | 23.77 | 9.23  |

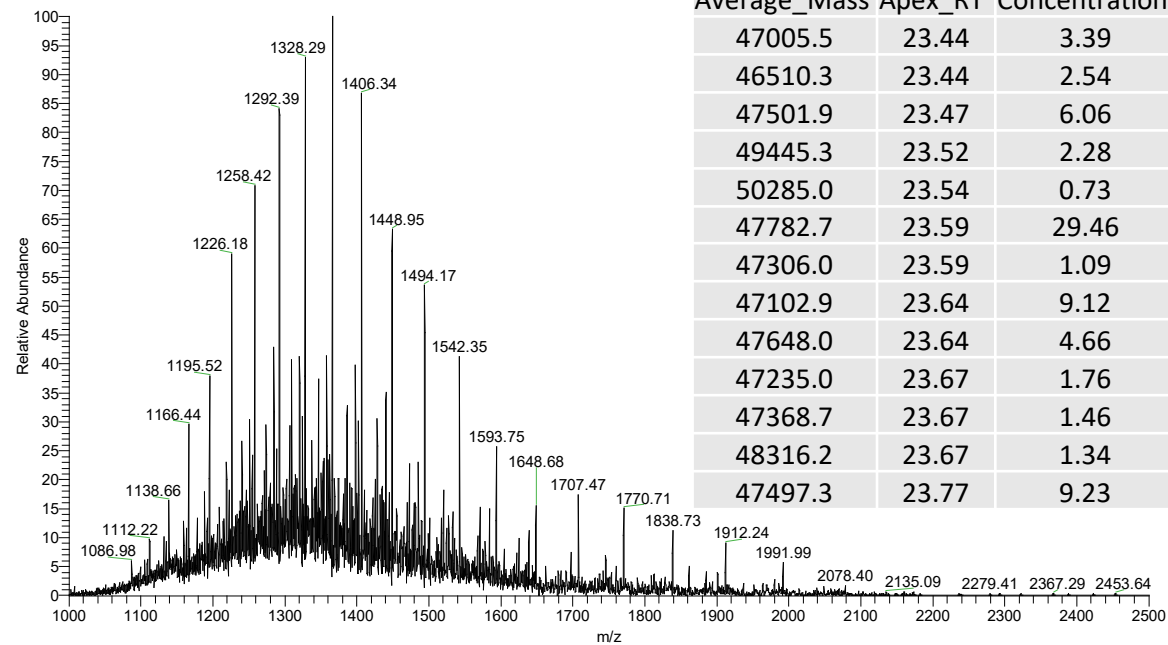

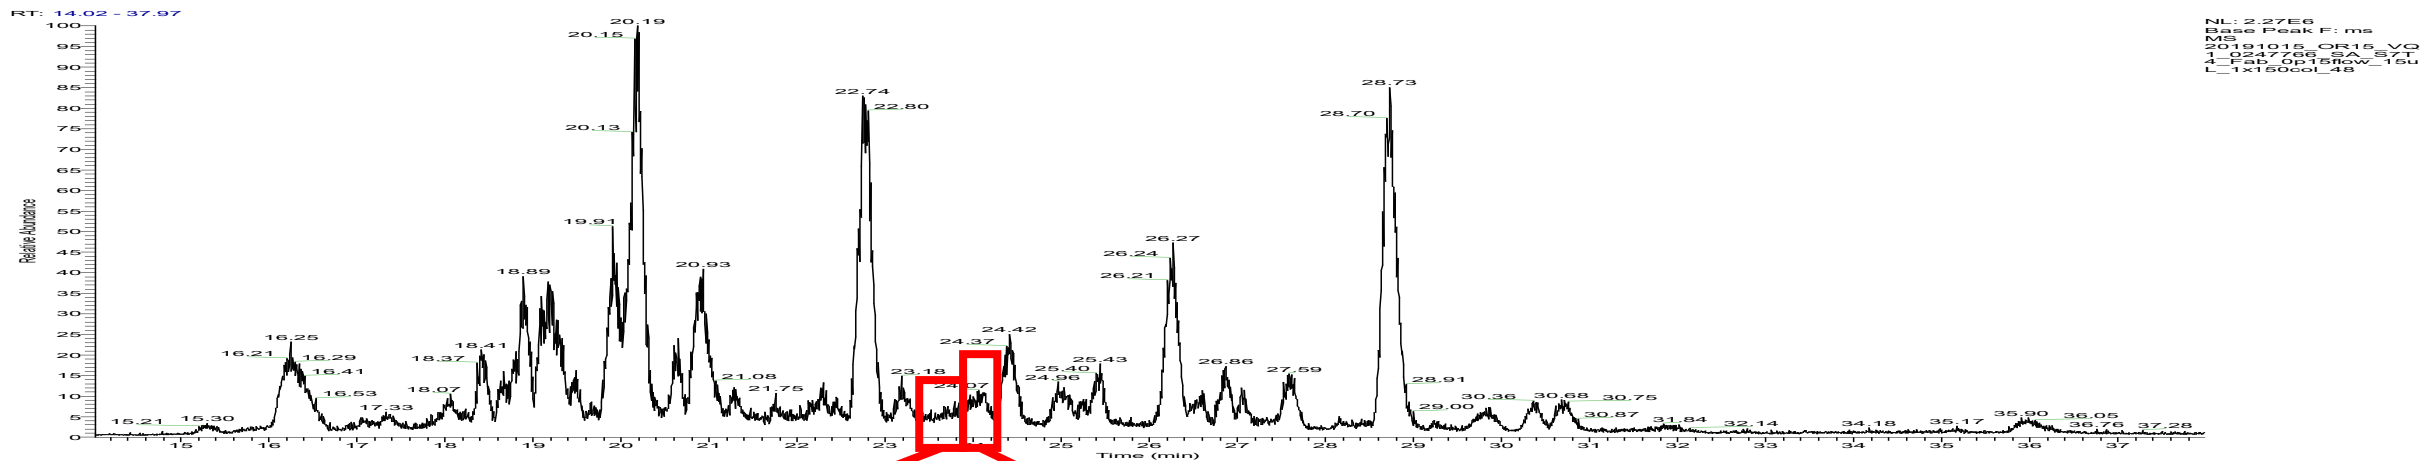

20191015\_OR15\_VQ1\_0247766\_SA\_S7T4\_Fab\_0p15flow\_15uL\_1x150col\_48 #4225-4314 RT: 23.40-23.80 AV: 90 NL: 4.33E4  
 T: FTMS + p ESI sid=15.00 Full ms [500.0000-3000.0000]

| Average_Mass | Apex_RT | Concentration |
|--------------|---------|---------------|
| 47999.6      | 23.84   | 3.96          |
| 46876.4      | 23.87   | 6.67          |
| 47654.1      | 23.99   | 2.31          |
| 47362.9      | 24.02   | 0.96          |
| 47479.8      | 24.07   | 15.61         |
| 48169.6      | 24.14   | 6.97          |

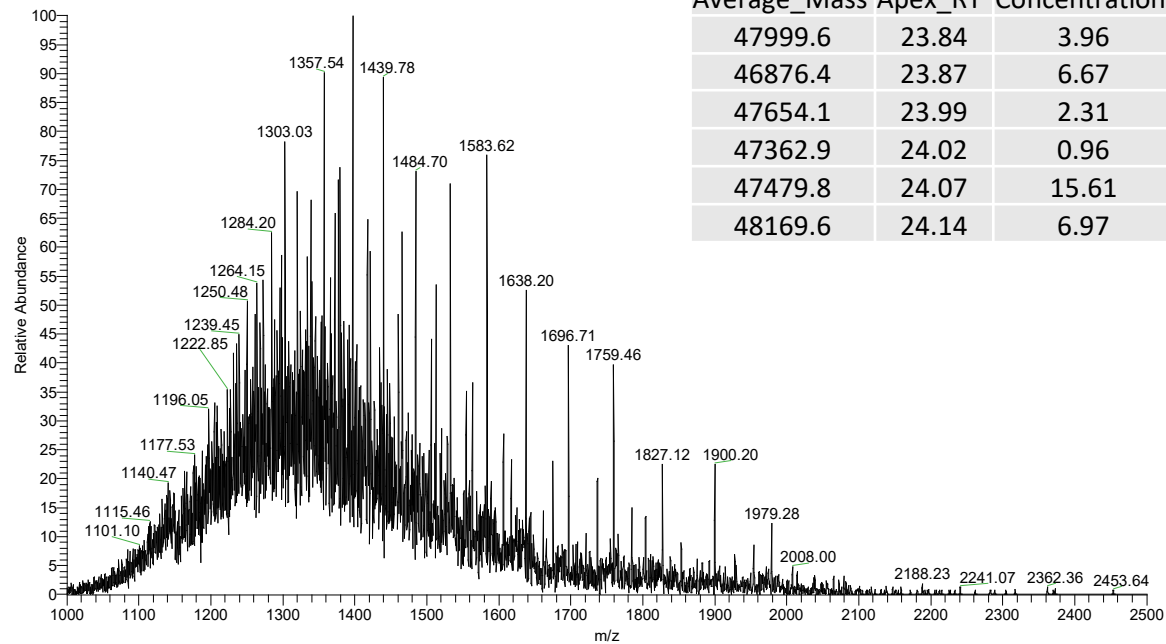

20191015\_OR15\_VQ1\_0247766\_SA\_S7T4\_Fab\_0p15flow\_15uL\_1x150col\_48 #4314-4403 RT: 23.80-24.20 AV: 90 NL: 7.62E4  
 T: FTMS + p ESI sid=15.00 Full ms [500.0000-3000.0000]

| Average_Mass | Apex_RT | Concentration |
|--------------|---------|---------------|
| 47676.9      | 24.22   | 3.80          |
| 47149.4      | 24.22   | 2.04          |
| 46637.3      | 24.24   | 5.99          |
| 47775.6      | 24.24   | 4.69          |
| 47290.5      | 24.24   | 3.70          |
| 47062.4      | 24.30   | 4.86          |
| 46871.8      | 24.30   | 2.78          |
| 47553.1      | 24.30   | 1.74          |
| 47837.5      | 24.34   | 16.55         |
| 47096.8      | 24.34   | 4.17          |
| 46985.7      | 24.34   | 1.32          |
| 46868.3      | 24.39   | 2.65          |
| 47299.9      | 24.44   | 20.18         |
| 46601.8      | 24.47   | 1.40          |
| 46833.2      | 24.49   | 21.47         |
| 46767.5      | 24.49   | 0.88          |
| 48256.5      | 24.59   | 7.73          |
| 47835.4      | 24.59   | 1.23          |
| 47091.7      | 24.59   | 0.75          |

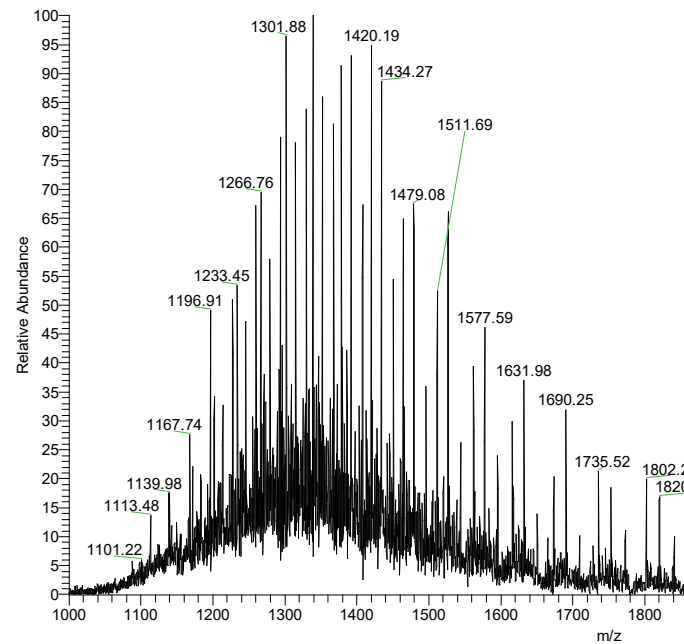

RT: 14.02 - 37.97

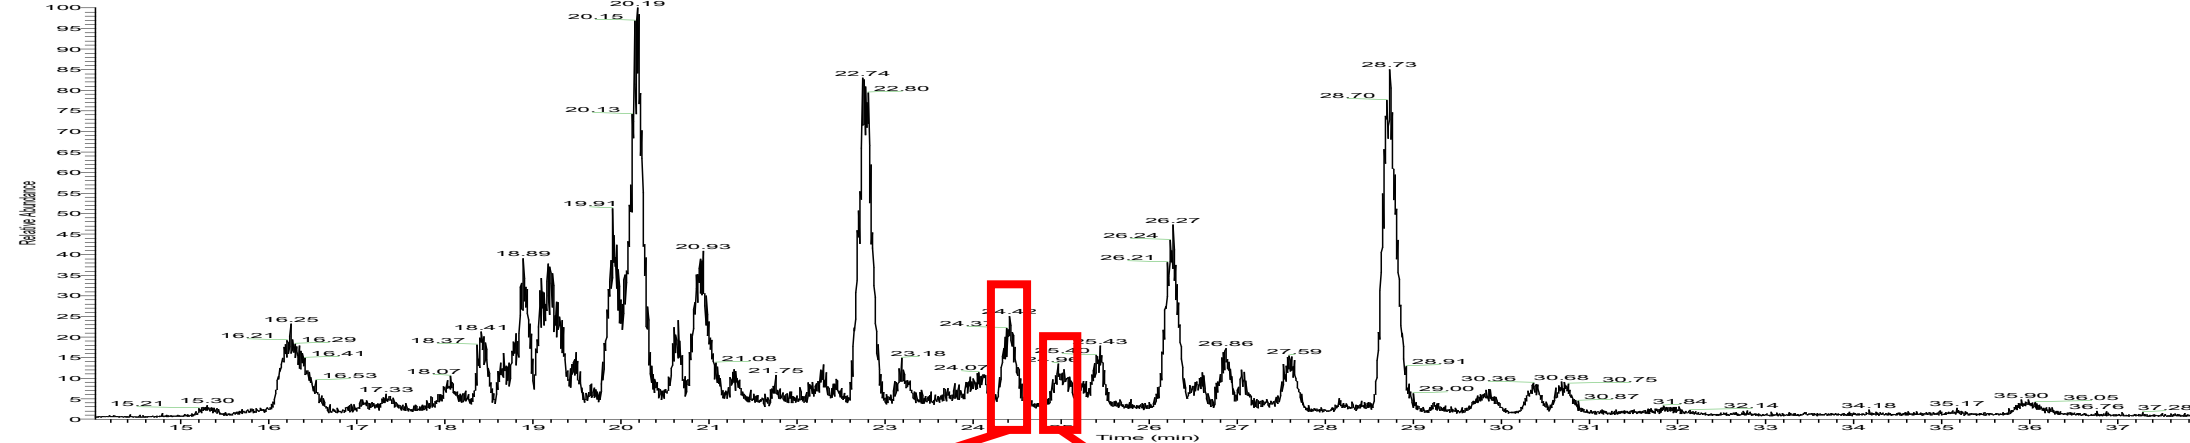

NL: 2.27E6  
 Base Peak F: ms  
 MS  
 20191015\_OR15\_VQ  
 1\_0247766\_SA\_S7T  
 1\_Fab\_0p15flow\_15u  
 L\_1x150col\_48

20191015\_OR15\_VQ1\_0247766\_SA\_S7T4\_Fab\_0p15flow\_15uL\_1x150col\_48 #4403-4512 RT: 24.20-24.70 AV: 110 NL: 1.71E5  
 T: FTMS + p ESI sid=15.00 Full ms [500.0000-3000.0000]

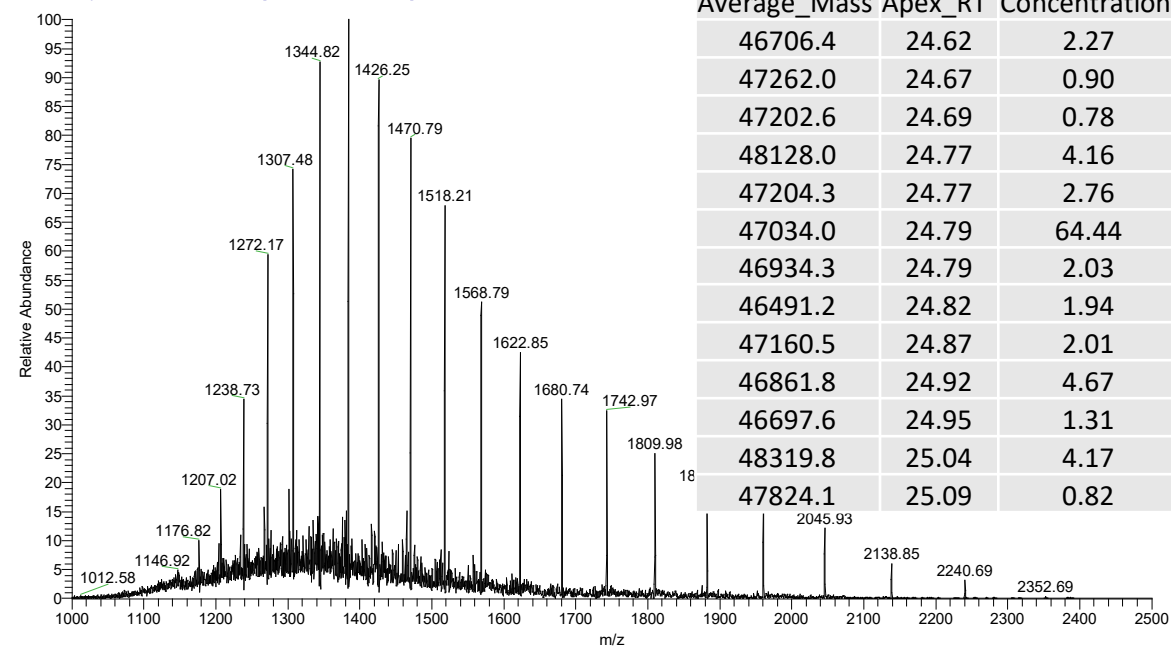

| Average_Mass | Apex_RT | Concentration |
|--------------|---------|---------------|
| 46706.4      | 24.62   | 2.27          |
| 47262.0      | 24.67   | 0.90          |
| 47202.6      | 24.69   | 0.78          |
| 48128.0      | 24.77   | 4.16          |
| 47204.3      | 24.77   | 2.76          |
| 47034.0      | 24.79   | 64.44         |
| 46934.3      | 24.79   | 2.03          |
| 46491.2      | 24.82   | 1.94          |
| 47160.5      | 24.87   | 2.01          |
| 46861.8      | 24.92   | 4.67          |
| 46697.6      | 24.95   | 1.31          |
| 48319.8      | 25.04   | 4.17          |
| 47824.1      | 25.09   | 0.82          |

20191015\_OR15\_VQ1\_0247766\_SA\_S7T4\_Fab\_0p15flow\_15uL\_1x150col\_48 #4512-4616 RT: 24.70-25.20 AV: 105 NL: 9.17E4  
 T: FTMS + p ESI sid=15.00 Full ms [500.0000-3000.0000]

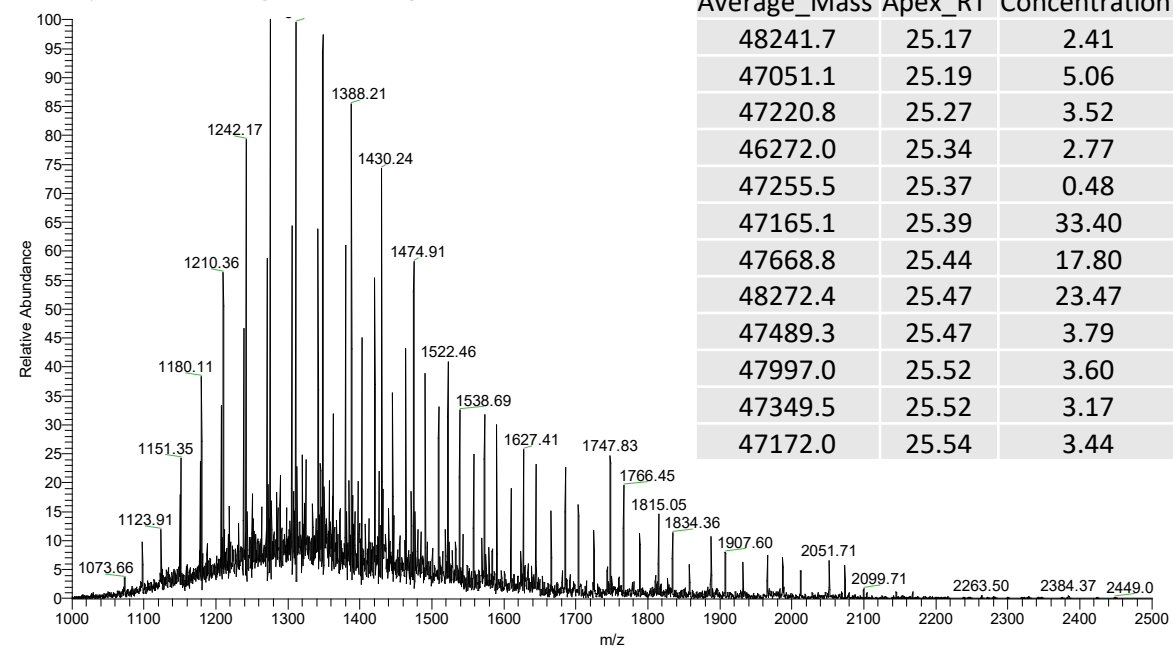

| Average_Mass | Apex_RT | Concentration |
|--------------|---------|---------------|
| 48241.7      | 25.17   | 2.41          |
| 47051.1      | 25.19   | 5.06          |
| 47220.8      | 25.27   | 3.52          |
| 46272.0      | 25.34   | 2.77          |
| 47255.5      | 25.37   | 0.48          |
| 47165.1      | 25.39   | 33.40         |
| 47668.8      | 25.44   | 17.80         |
| 48272.4      | 25.47   | 23.47         |
| 47489.3      | 25.47   | 3.79          |
| 47997.0      | 25.52   | 3.60          |
| 47349.5      | 25.52   | 3.17          |
| 47172.0      | 25.54   | 3.44          |

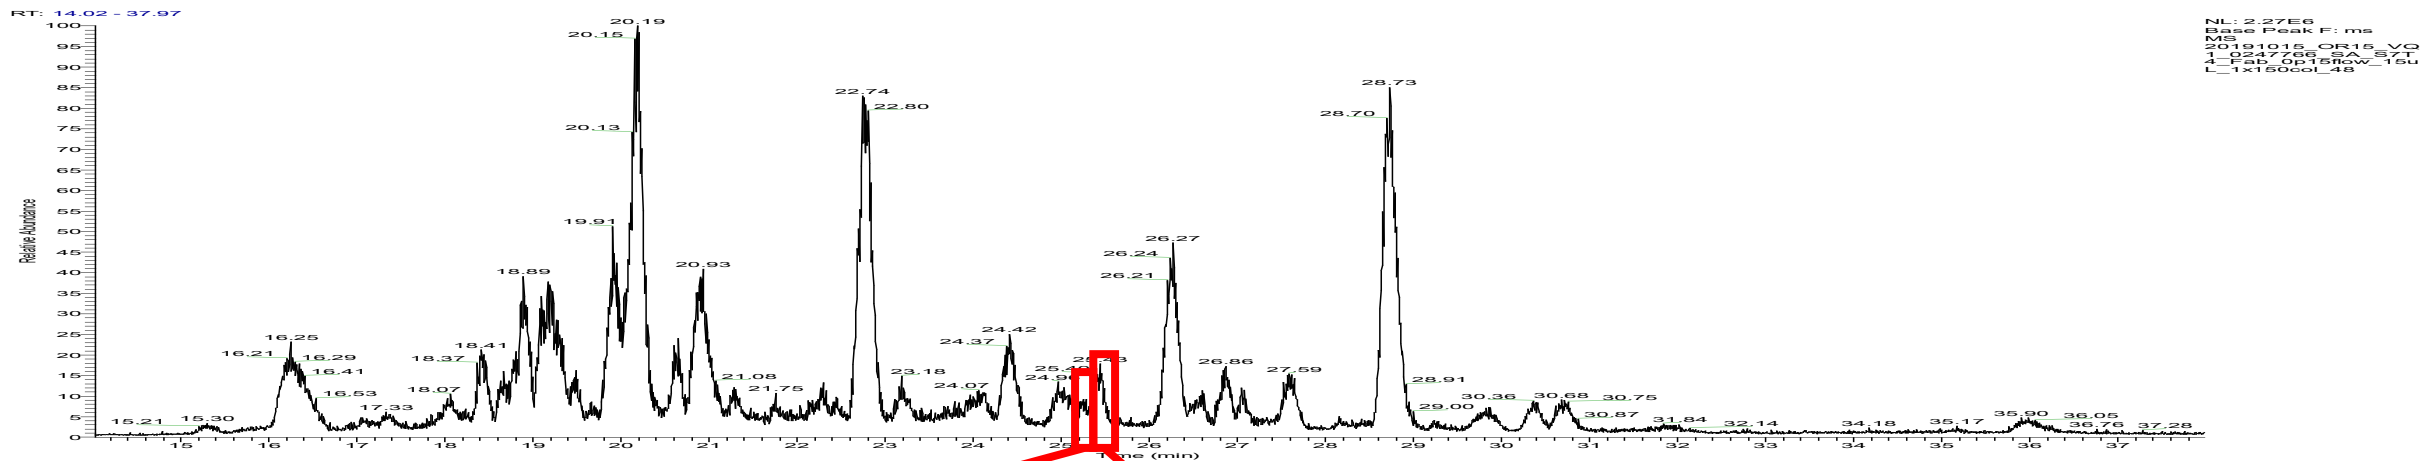

20191015\_OR15\_VQ1\_0247766\_SA\_S7T4\_Fab\_0p15flow\_15uL\_1x150col\_48 #4616-4637

RT: 25.20-25.30 AV: 22 NL: 1.34E5

T: FTMS + p ESI sid=15.00 Full ms [500.0000-3000.0000]

| Average_Mass | Apex_RT | Concentration |
|--------------|---------|---------------|
| 47174.6      | 25.64   | 17.15         |
| 47105.9      | 25.64   | 6.22          |
| 47438.2      | 25.69   | 2.10          |

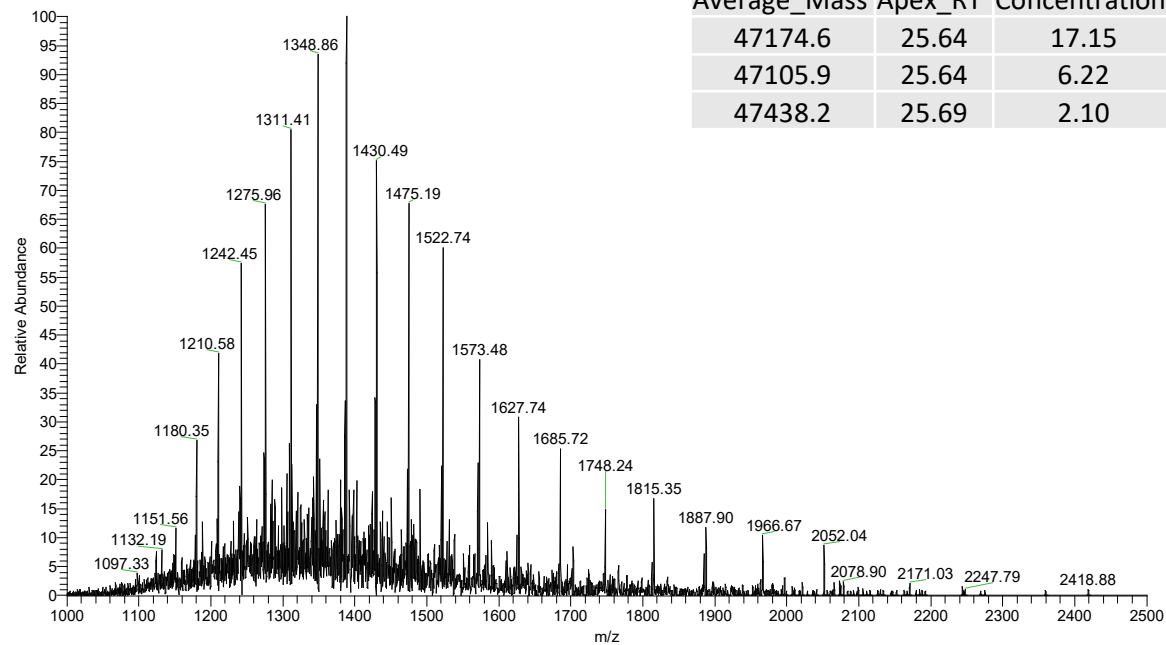

20191015\_OR15\_VQ1\_0247766\_SA\_S7T4\_Fab\_0p15flow\_15uL\_1x150col\_48 #4637-4680

RT: 25.30-25.50 AV: 44 NL: 1.96E5

T: FTMS + p ESI sid=15.00 Full ms [500.0000-3000.0000]

| Average_Mass | Apex_RT | Concentration |
|--------------|---------|---------------|
| 47509.4      | 25.77   | 9.06          |
| 45915.4      | 25.82   | 33.50         |
| 48312.3      | 25.82   | 12.84         |
| 47640.0      | 25.87   | 4.39          |
| 47398.6      | 25.89   | 1.97          |

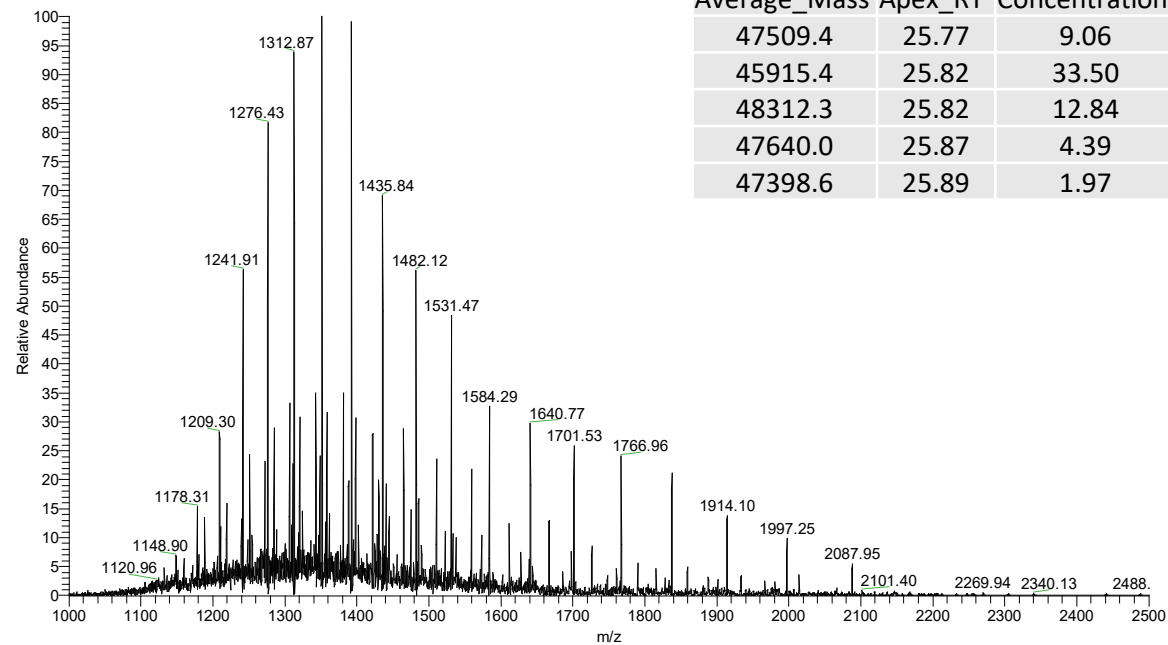



RT: 14.02 - 37.97

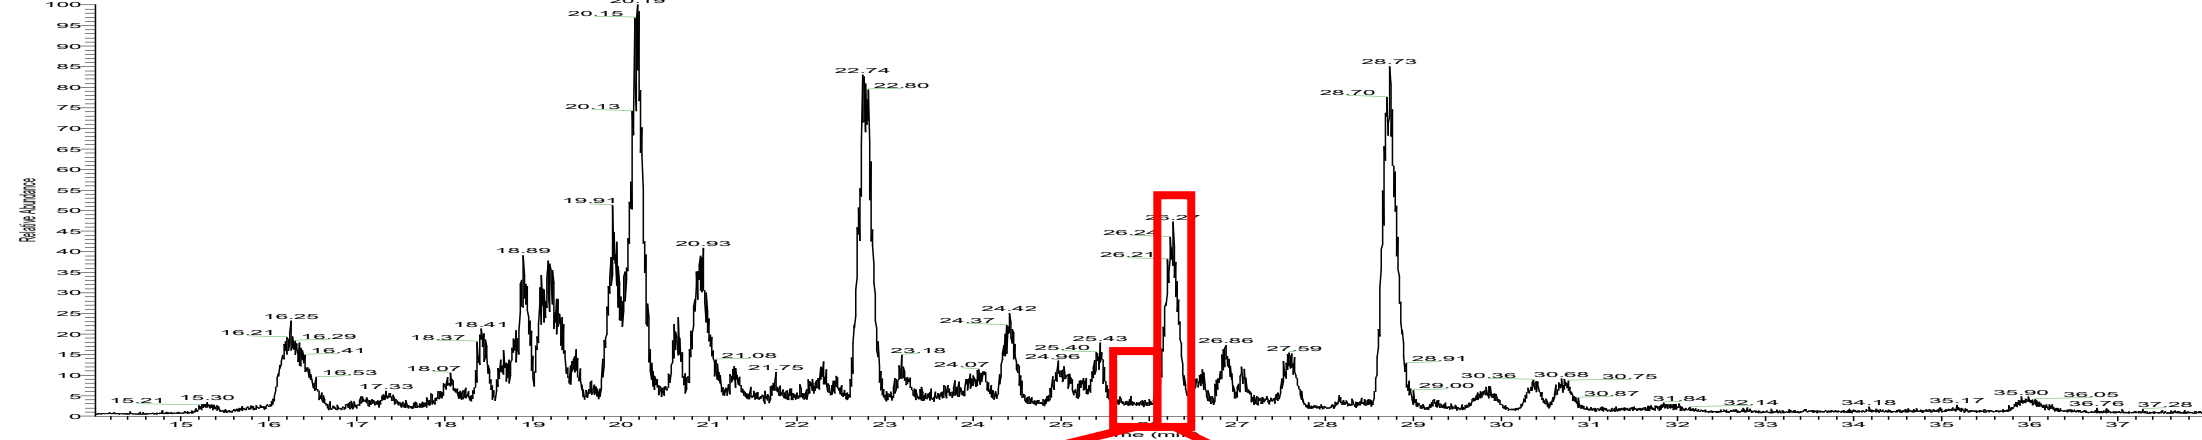

NL: 2.27E6  
 Base Peak F: ms  
 MS  
 20191015\_OR15\_VQ  
 1\_0247766\_SA\_S7T  
 1\_Fab\_0p15flow\_15u  
 L\_1x150col\_48

20191015\_OR15\_VQ1\_0247766\_SA\_S7T4\_Fab\_0p15flow\_15uL\_1x150col\_48 #4680-4783 RT: 25.50-26.00 AV: 104 NL: 2.31E4  
 T: FTMS + p ESI sid=15.00 Full ms [500.0000-3000.0000]

| Average_Mass | Apex_RT | Concentration |
|--------------|---------|---------------|
| 47705.0      | 25.99   | 2.97          |
| 47781.9      | 26.02   | 3.15          |
| 47076.5      | 26.24   | 1.17          |
| 46990.9      | 26.29   | 1.94          |
| 47479.2      | 26.34   | 3.27          |
| 47750.3      | 26.37   | 1.27          |

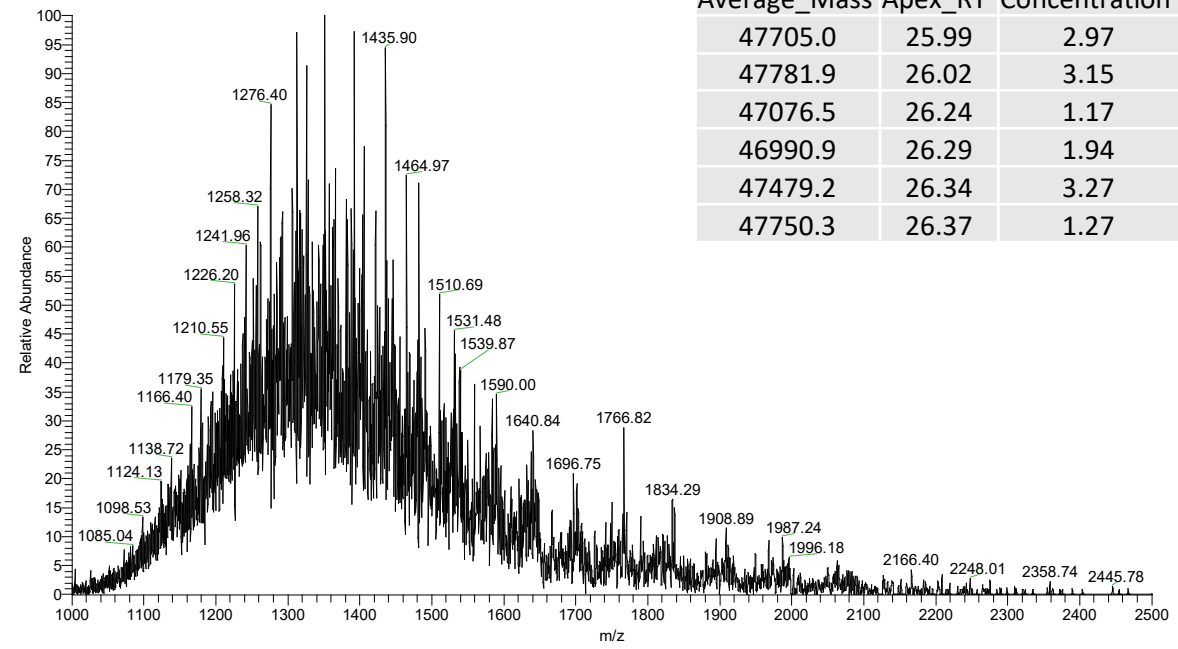

20191015\_OR15\_VQ1\_0247766\_SA\_S7T4\_Fab\_0p15flow\_15uL\_1x150col\_48 #4783-4868 RT: 26.00-26.40 AV: 86 NL: 3.94E5  
 T: FTMS + p ESI sid=15.00 Full ms [500.0000-3000.0000]

| Average_Mass | Apex_RT | Concentration |
|--------------|---------|---------------|
| 48012.2      | 26.47   | 3.30          |
| 47853.2      | 26.49   | 3.29          |
| 47720.7      | 26.49   | 1.84          |
| 47682.7      | 26.54   | 13.67         |
| 46590.2      | 26.57   | 6.90          |
| 47553.3      | 26.62   | 3.75          |
| 47653.1      | 26.64   | 127.98        |
| 46860.7      | 26.69   | 21.33         |
| 47388.5      | 26.79   | 3.89          |

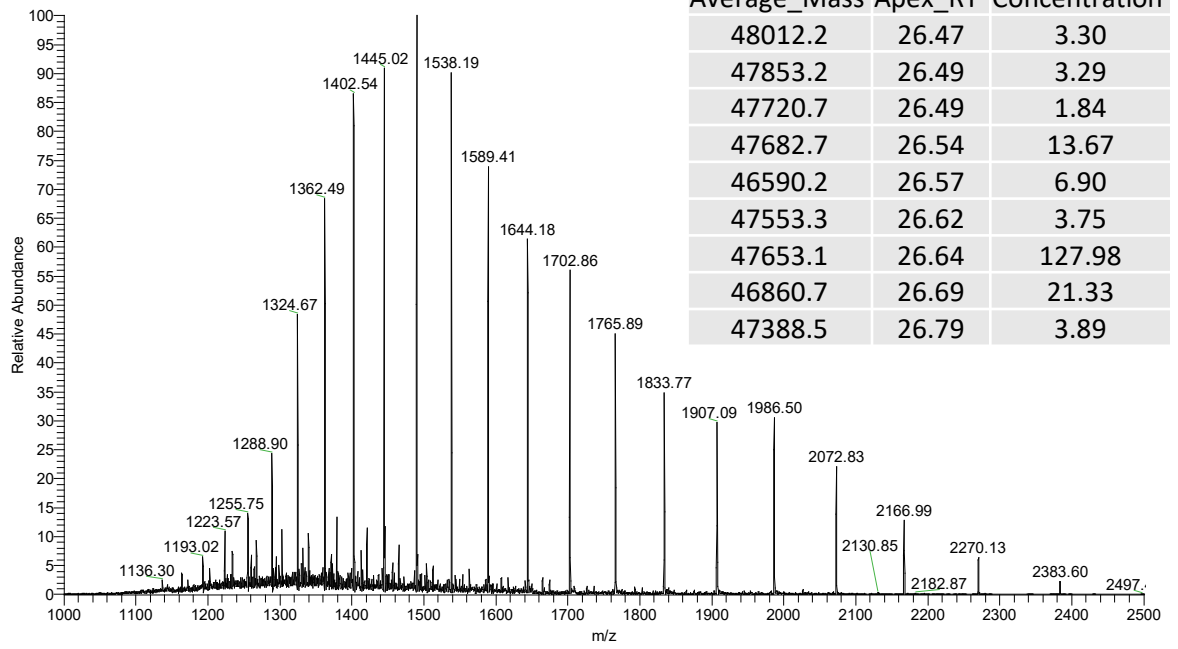

RT: 14.02 - 37.97

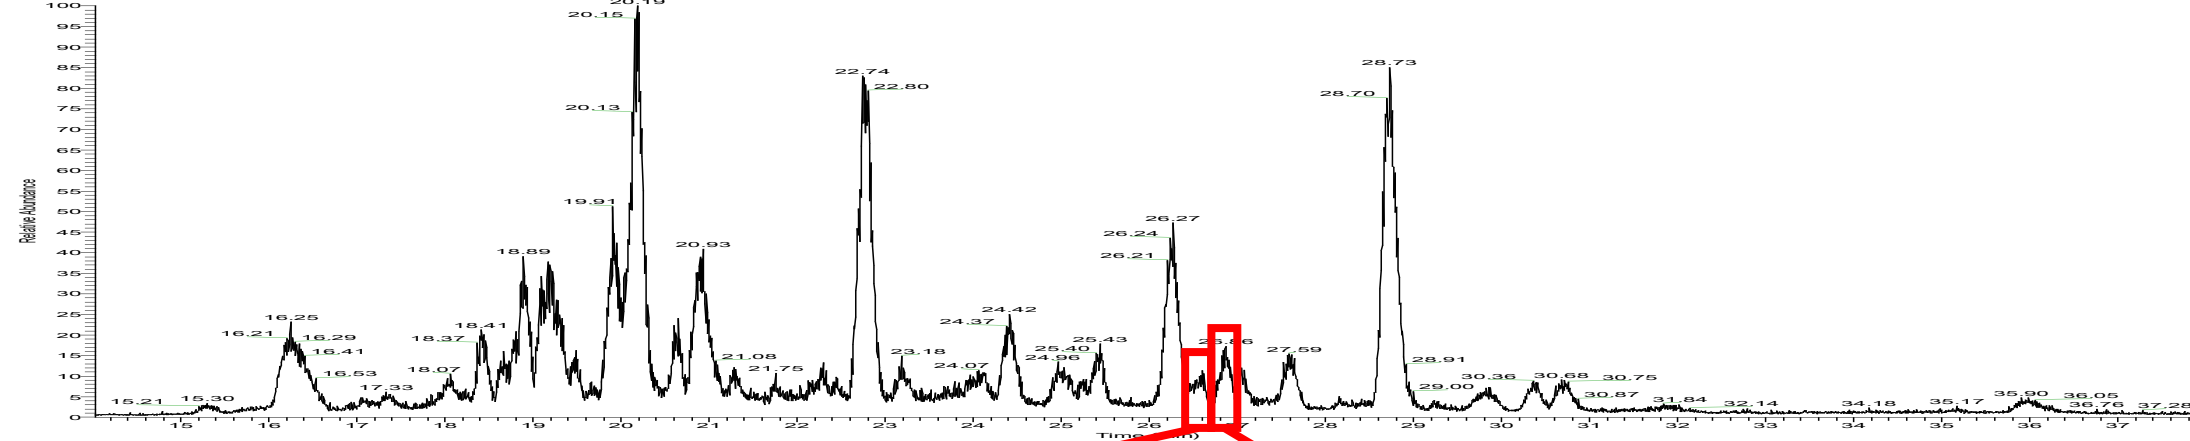

NL: 2.27E6  
 Base Peak F: ms  
 MS  
 20191015\_OR15\_VQ  
 1\_0247766\_SA\_S7T  
 1\_Fab\_0p15flow\_15u  
 L\_1x150col\_48

20191015\_OR15\_VQ1\_0247766\_SA\_S7T4\_Fab\_0p15flow\_15uL\_1x150col\_48 #4868-4927  
 T: FTMS + p ESI sid=15.00 Full ms [500.0000-3000.0000]

RT: 26.40-26.70 AV: 60 NL: 1.12E5

| Average_Mass | Apex_RT | Concentration |
|--------------|---------|---------------|
| 47669.7      | 26.94   | 28.42         |
| 47436.3      | 26.97   | 1.86          |

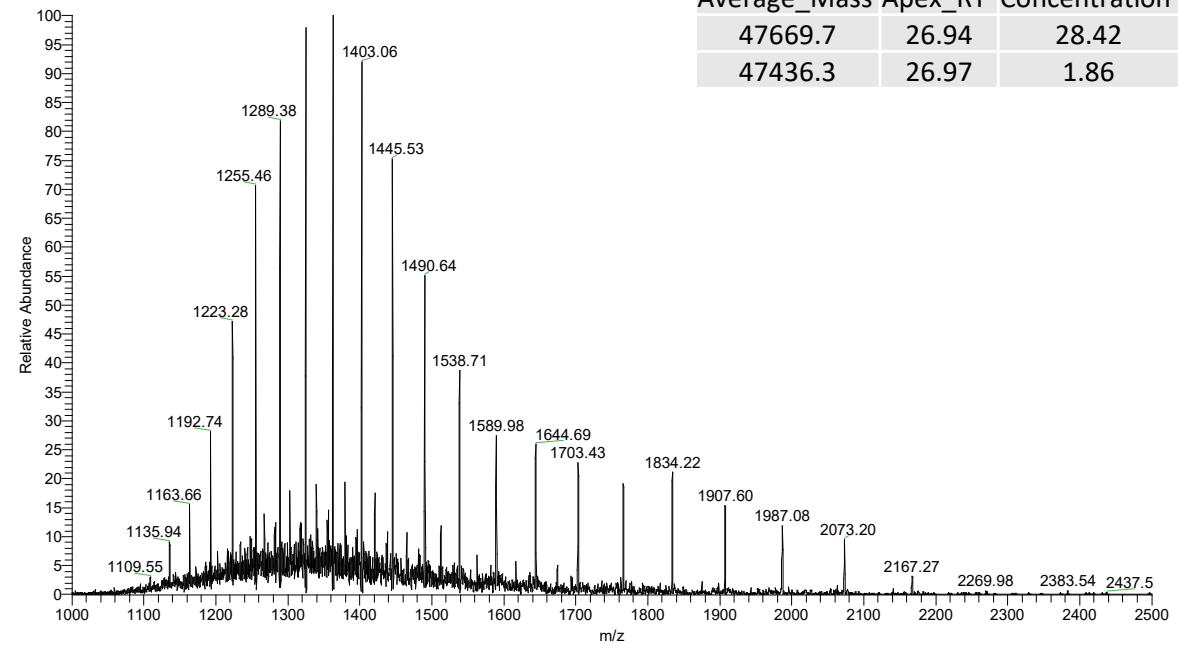

20191015\_OR15\_VQ1\_0247766\_SA\_S7T4\_Fab\_0p15flow\_15uL\_1x150col\_48 #4927-4988  
 T: FTMS + p ESI sid=15.00 Full ms [500.0000-3000.0000]

RT: 26.70-27.00 AV: 62 NL: 1.65E5

| Average_Mass | Apex_RT | Concentration |
|--------------|---------|---------------|
| 47102.8      | 27.17   | 2.93          |
| 47912.2      | 27.24   | 35.33         |
| 47814.6      | 27.24   | 2.28          |
| 48122.3      | 27.37   | 2.22          |

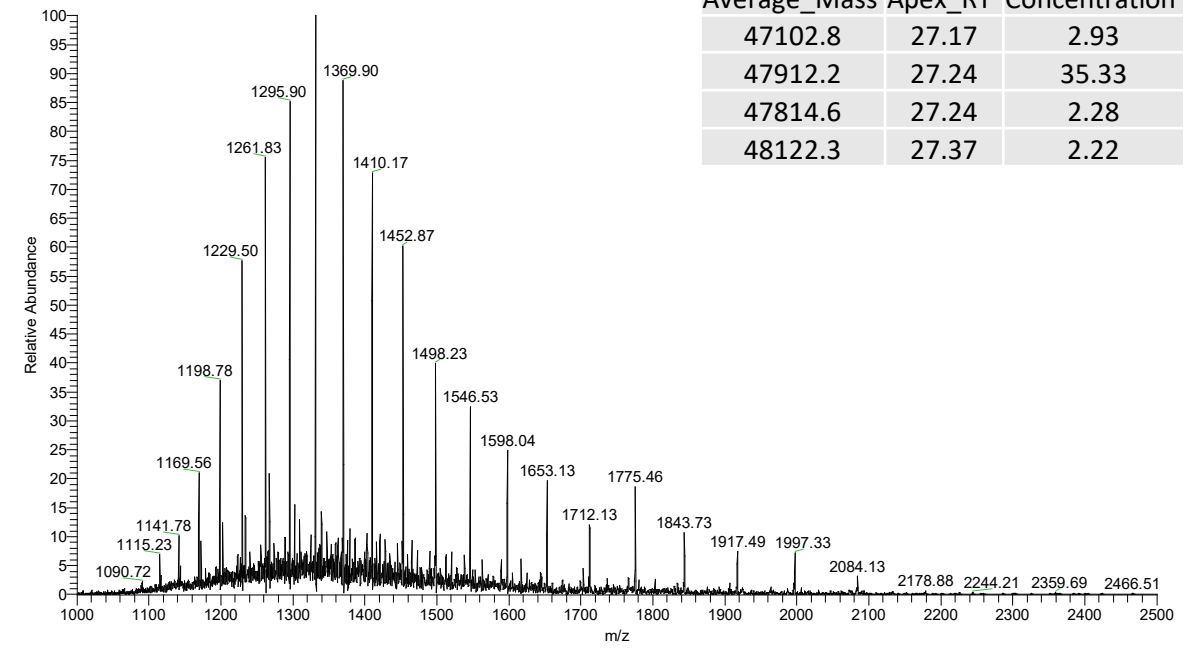

RT: 14.02 - 37.97

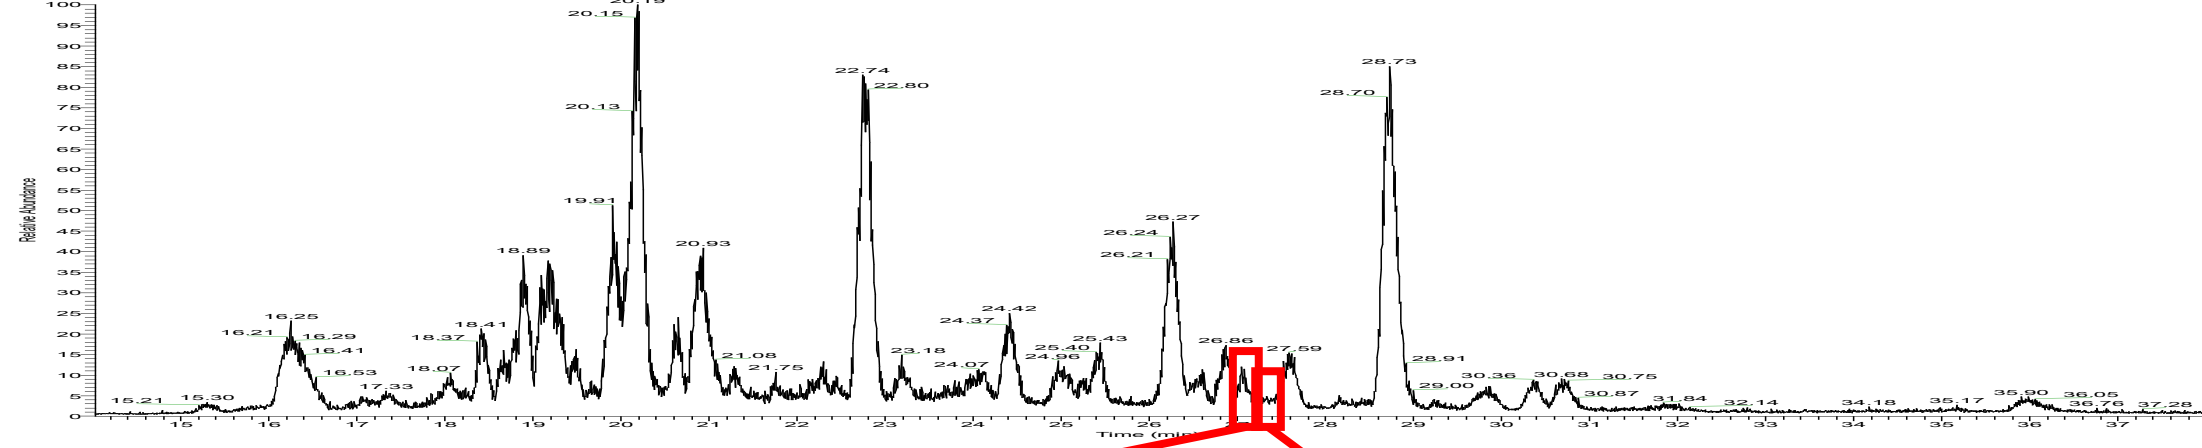

NL: 2.27E6  
 Base Peak F: ms  
 MS  
 20191015\_OR15\_VQ  
 1\_0247766\_SA\_S7T  
 1\_Fab\_0p15flow\_15u  
 L\_1x150col\_48

20191015\_OR15\_VQ1\_0247766\_SA\_S7T4\_Fab\_0p15flow\_15uL\_1x150col\_48 #4988-5028  
 T: FTMS + p ESI sid=15.00 Full ms [500.0000-3000.0000]

RT: 27.00-27.20 AV: 41 NL: 1.18E5

| Average_Mass | Apex_RT | Concentration |
|--------------|---------|---------------|
| 47604.5      | 27.44   | 2.16          |
| 47885.4      | 27.47   | 20.32         |
| 48348.7      | 27.47   | 1.74          |
| 47238.7      | 27.54   | 2.61          |

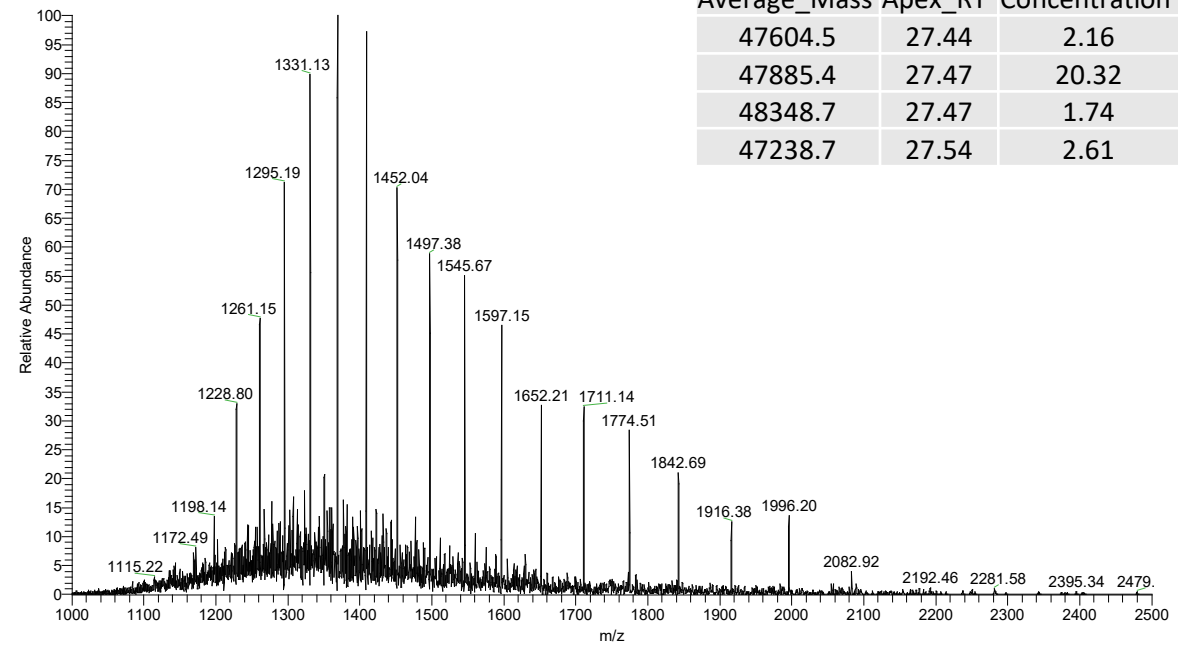

20191015\_OR15\_VQ1\_0247766\_SA\_S7T4\_Fab\_0p15flow\_15uL\_1x150col\_48 #5028-5068  
 T: FTMS + p ESI sid=15.00 Full ms [500.0000-3000.0000]

RT: 27.20-27.40 AV: 41 NL: 3.96E4

| Average_Mass | Apex_RT | Concentration |
|--------------|---------|---------------|
| 47128.1      | 27.62   | 0.36          |
| 48178.6      | 27.67   | 4.96          |
| 50256.6      | 27.69   | 5.85          |
| 47230.8      | 27.69   | 0.89          |
| 48277.0      | 27.74   | 6.36          |
| 48772.6      | 27.77   | 1.24          |
| 45862.6      | 27.79   | 2.28          |

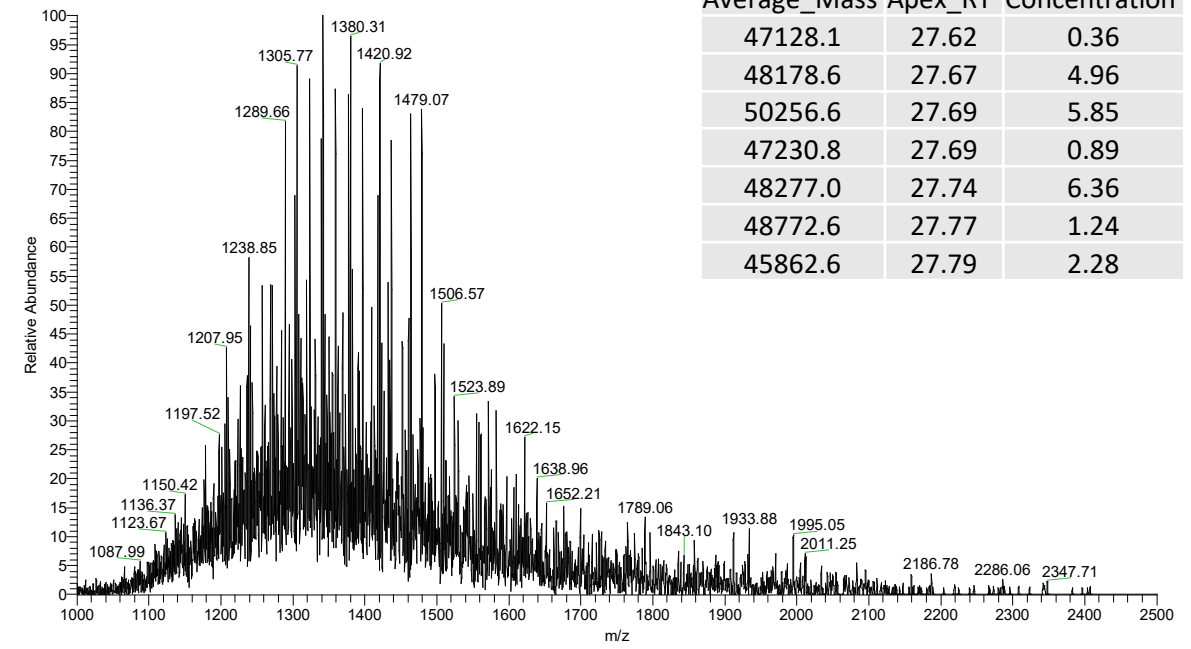

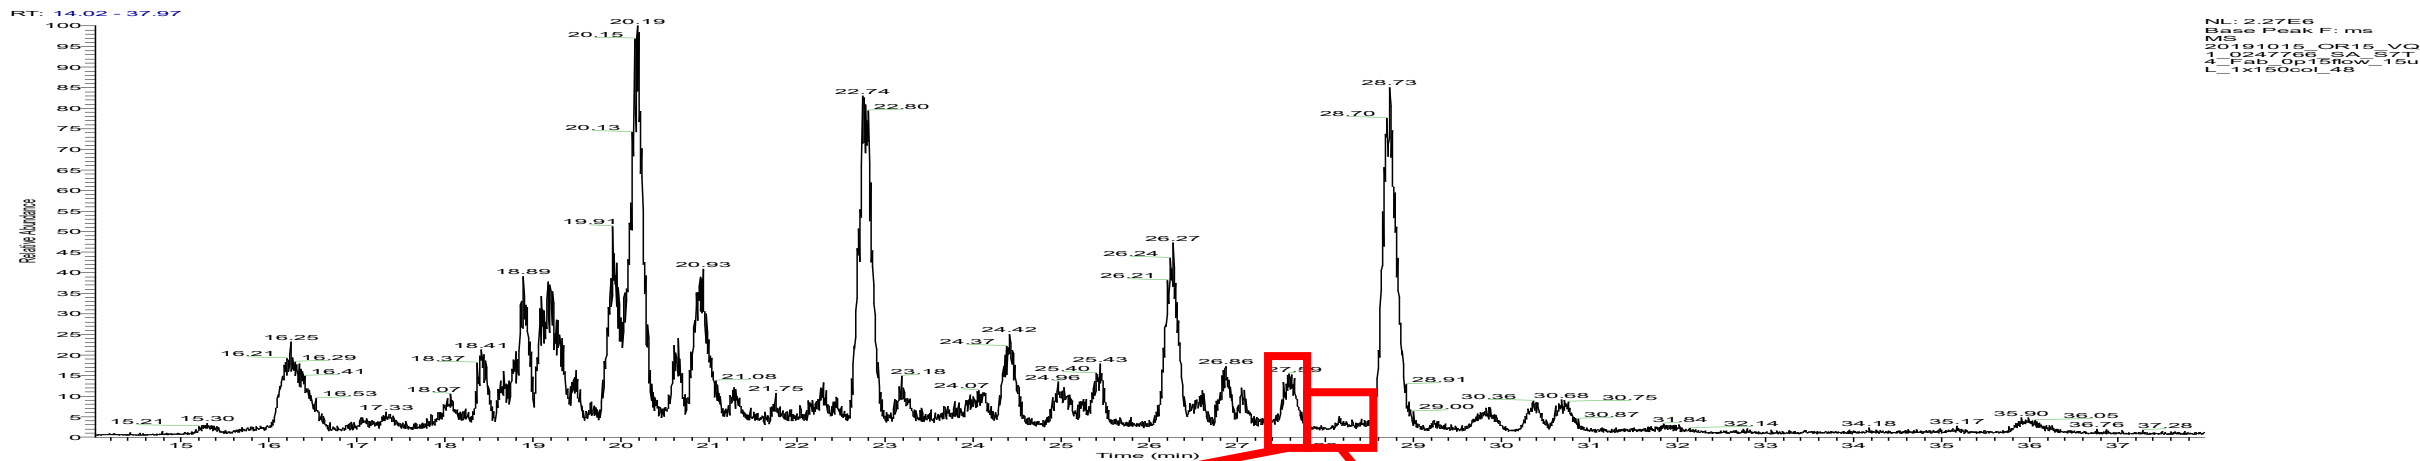

20191015\_OR15\_VQ1\_0247766\_SA\_S7T4\_Fab\_0p15flow\_15uL\_1x150col\_48 #5068-5146  
T: FTMS + p ESI sid=15.00 Full ms [500.0000-3000.0000]

RT: 27.40-27.80 AV: 79 NL: 1.31E5

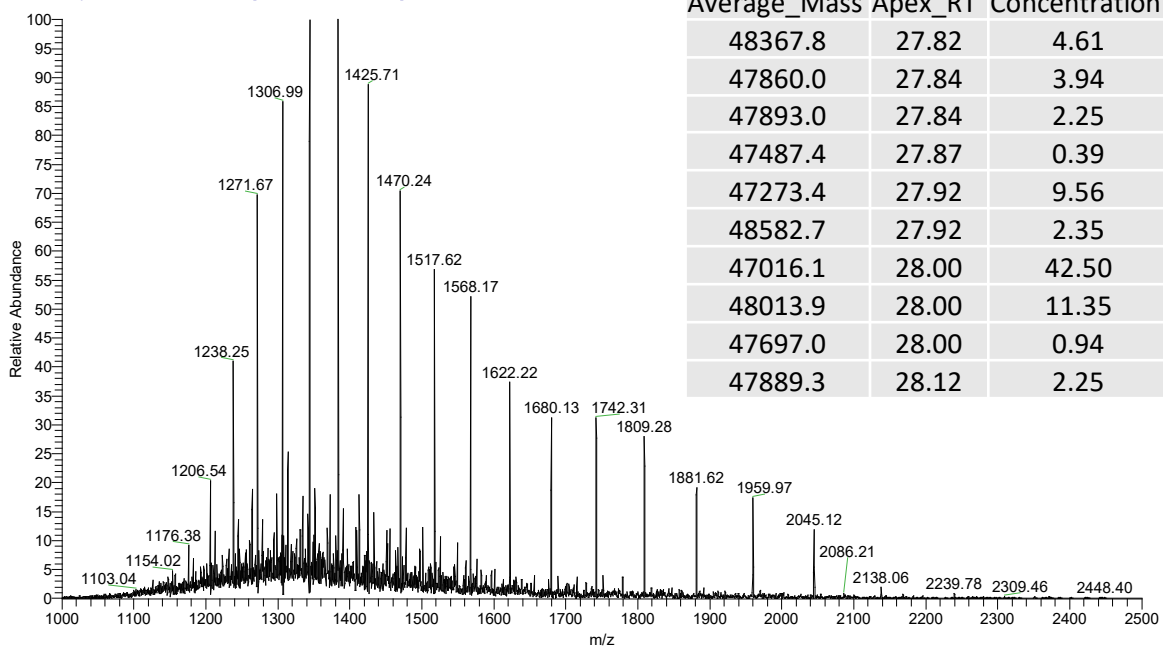

20191015\_OR15\_VQ1\_0247766\_SA\_S7T4\_Fab\_0p15flow\_15uL\_1x150col\_48 #5146-5278  
T: FTMS + p ESI sid=15.00 Full ms [500.0000-3000.0000]

RT: 27.80-28.50 AV: 133 NL: 2.49E4

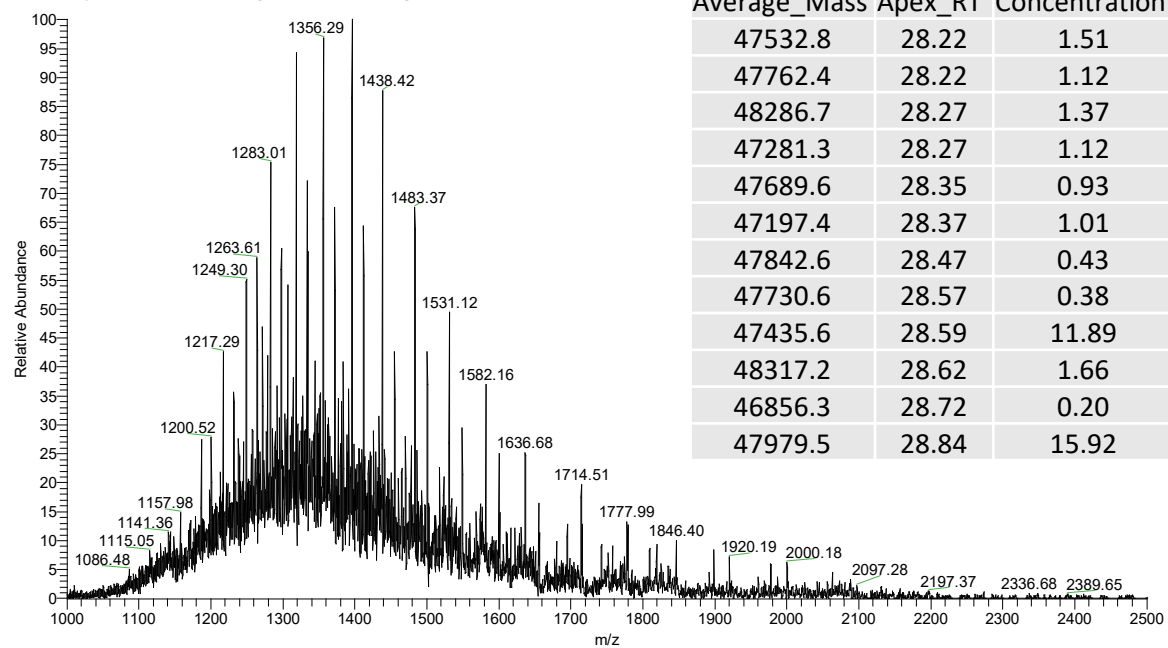

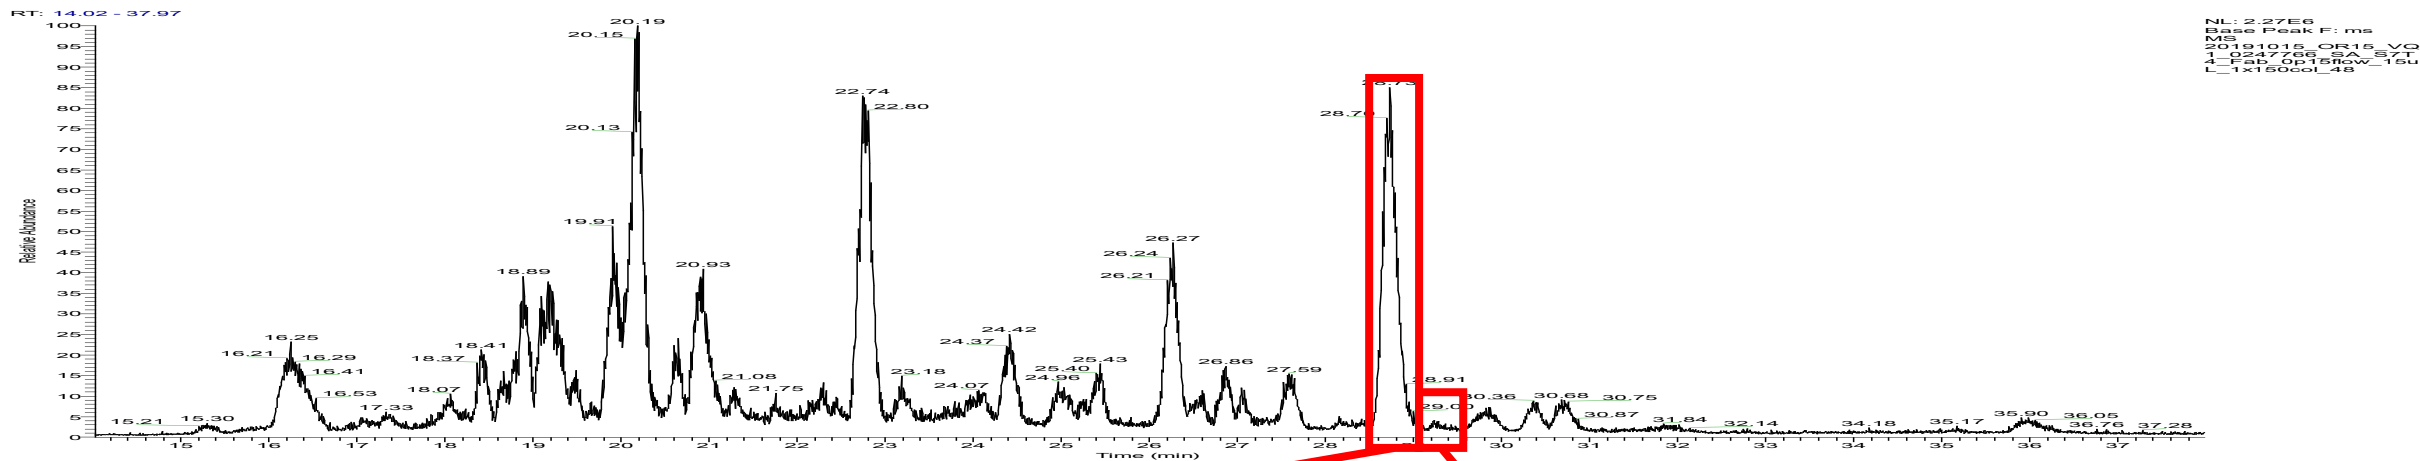

20191015\_OR15\_VQ1\_0247766\_SA\_S7T4\_Fab\_0p15flow\_15uL\_1x150col\_48 #5278-5381 RT: 28.50-29.00 AV: 104 NL: 6.85E5  
T: FTMS + p ESI sid=15.00 Full ms [500.0000-3000.0000]

| Average_Mass | Apex_RT | Concentration |
|--------------|---------|---------------|
| 48263.3      | 29.04   | 4.16          |
| 47997.9      | 29.12   | 255.59        |
| 47898.3      | 29.12   | 8.25          |
| 48051.2      | 29.19   | 1.15          |
| 48452.6      | 29.32   | 0.70          |
| 47884.2      | 29.34   | 8.97          |
| 46916.5      | 29.40   | 4.26          |

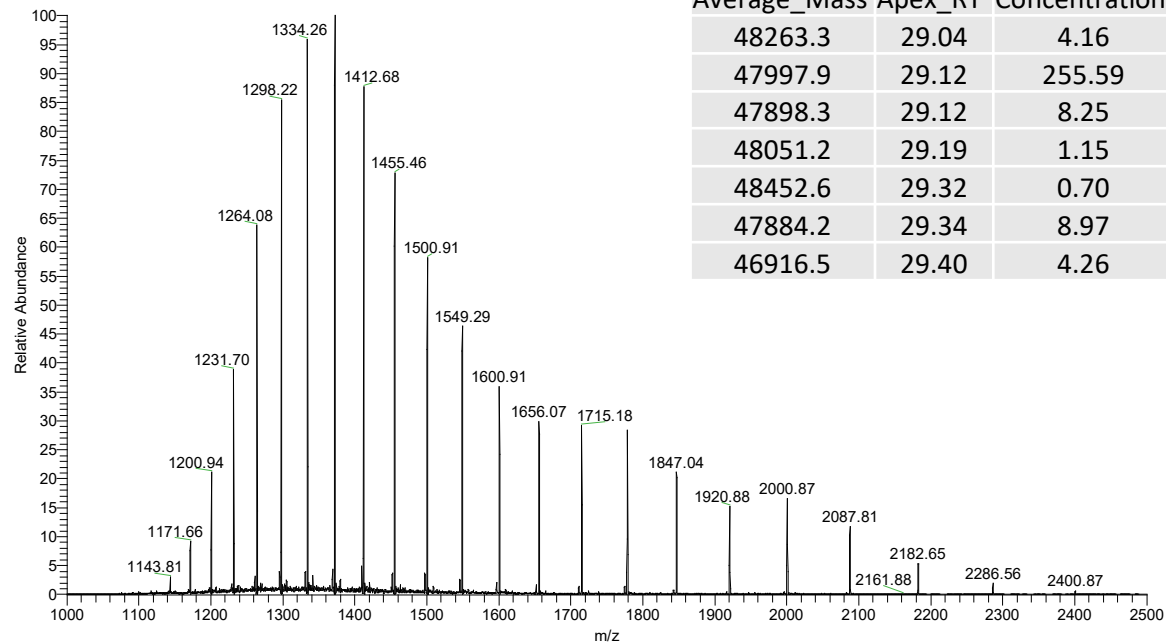

20191015\_OR15\_VQ1\_0247766\_SA\_S7T4\_Fab\_0p15flow\_15uL\_1x150col\_48 #5381-5475 RT: 29.00-29.50 AV: 95 NL: 2.23E4  
T: FTMS + p ESI sid=15.00 Full ms [500.0000-3000.0000]

| Average_Mass | Apex_RT | Concentration |
|--------------|---------|---------------|
| 47413.7      | 29.42   | 0.33          |
| 47185.1      | 29.69   | 1.66          |
| 48461.4      | 29.72   | 1.20          |
| 47063.7      | 29.84   | 2.49          |
| 47302.4      | 29.87   | 0.78          |
| 47248.6      | 29.90   | 1.73          |
| 46963.8      | 29.90   | 1.13          |

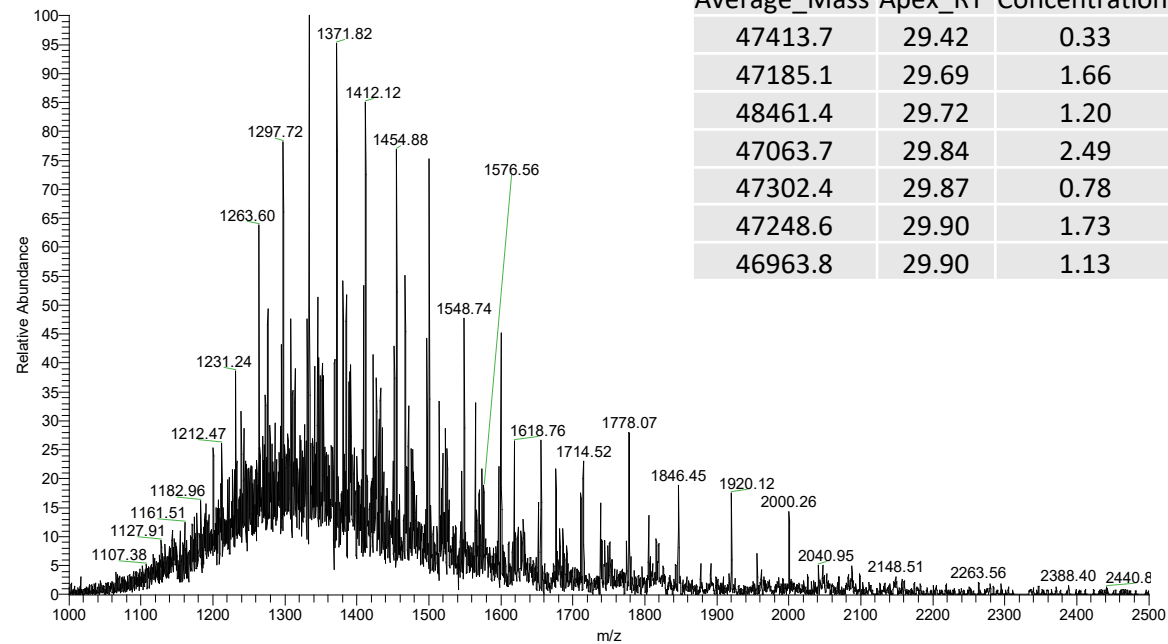

RT: 14.02 - 37.97

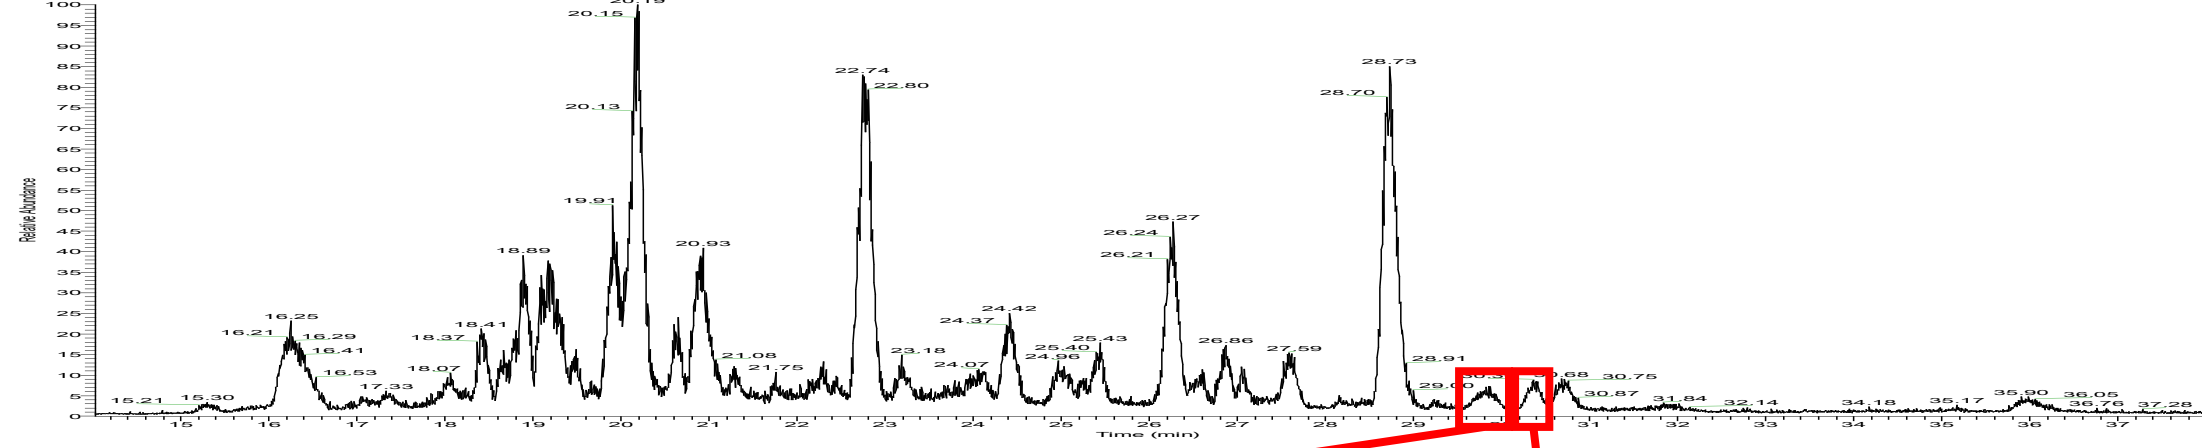

NL: 2.27E6  
 Base Peak F: ms  
 MS  
 20191015\_OR15\_VQ  
 1\_0247766\_SA\_S7T  
 1\_Fab\_0p15flow\_15u  
 L\_1x150col\_48

20191015\_OR15\_VQ1\_0247766\_SA\_S7T4\_Fab\_0p15flow\_15uL\_1x150col\_48 #5475-5607  
 T: FTMS + p ESI sid=15.00 Full ms [500.0000-3000.0000]

RT: 29.50-30.20 AV: 133 NL: 5.35E4

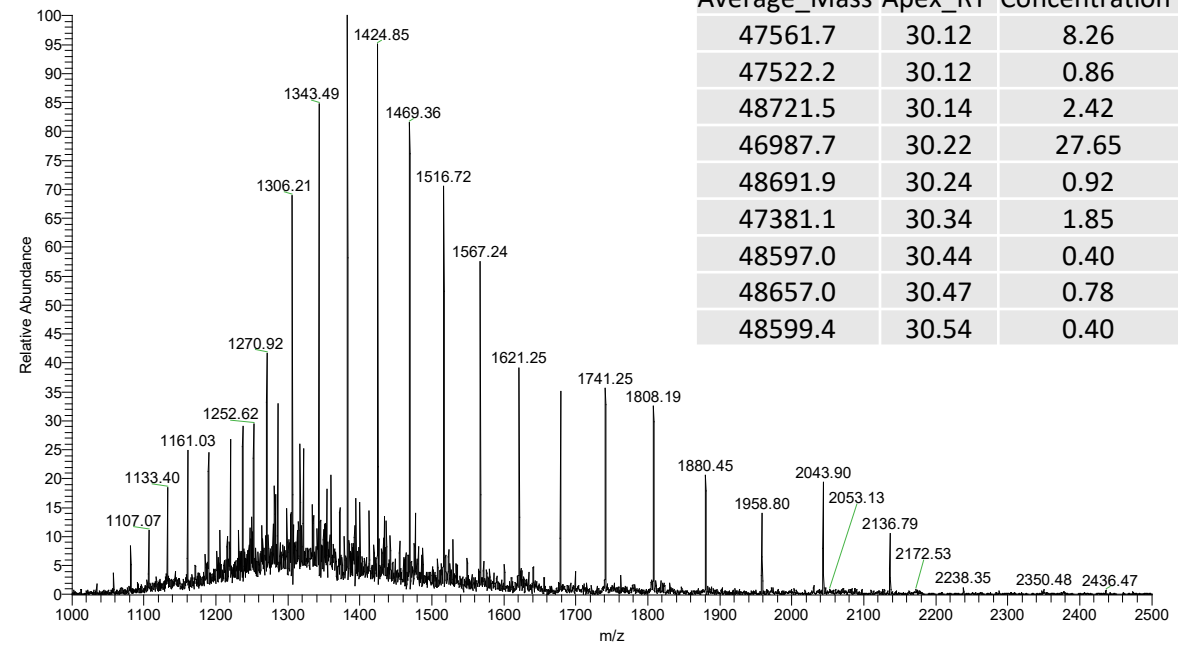

| Average_Mass | Apex_RT | Concentration |
|--------------|---------|---------------|
| 47561.7      | 30.12   | 8.26          |
| 47522.2      | 30.12   | 0.86          |
| 48721.5      | 30.14   | 2.42          |
| 46987.7      | 30.22   | 27.65         |
| 48691.9      | 30.24   | 0.92          |
| 47381.1      | 30.34   | 1.85          |
| 48597.0      | 30.44   | 0.40          |
| 48657.0      | 30.47   | 0.78          |
| 48599.4      | 30.54   | 0.40          |

20191015\_OR15\_VQ1\_0247766\_SA\_S7T4\_Fab\_0p15flow\_15uL\_1x150col\_48 #5607-5663  
 T: FTMS + p ESI sid=15.00 Full ms [500.0000-3000.0000]

RT: 30.20-30.50 AV: 57 NL: 9.28E4

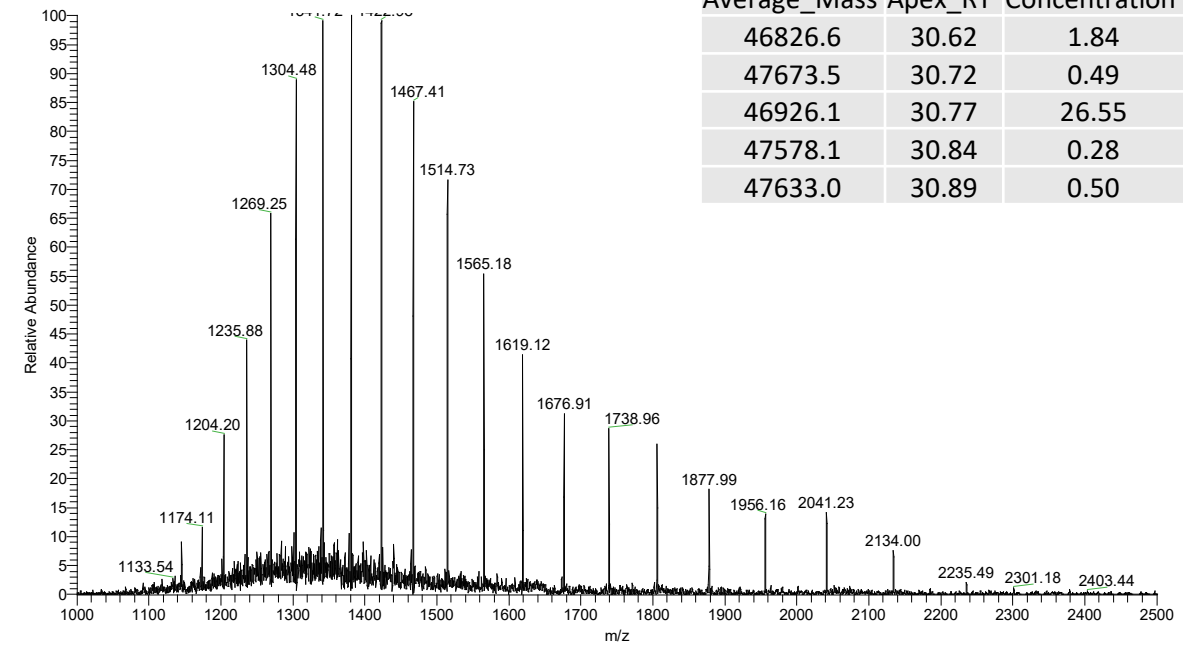

| Average_Mass | Apex_RT | Concentration |
|--------------|---------|---------------|
| 46826.6      | 30.62   | 1.84          |
| 47673.5      | 30.72   | 0.49          |
| 46926.1      | 30.77   | 26.55         |
| 47578.1      | 30.84   | 0.28          |
| 47633.0      | 30.89   | 0.50          |

RT: 14.02 - 37.97

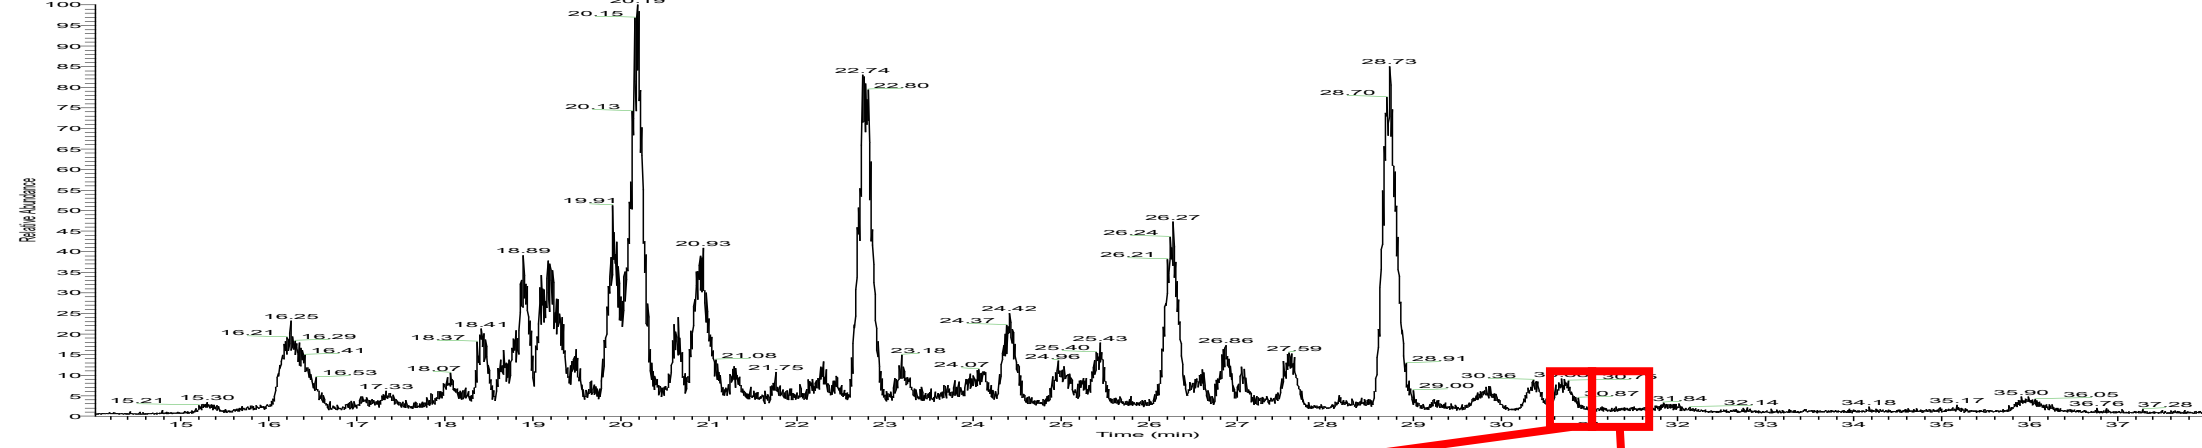

NL: 2.27E6  
 Base Peak F: ms  
 MS  
 20191015\_OR15\_VQ  
 1\_0247766\_SA\_S7T  
 1\_Fab\_0p15flow\_15u  
 L\_1x150col\_48

20191015\_OR15\_VQ1\_0247766\_SA\_S7T4\_Fab\_0p15flow\_15uL\_1x150col\_48 #5663-5738 RT: 30.50-30.90 AV: 76 NL: 9.01E4  
 T: FTMS + p ESI sid=15.00 Full ms [500.0000-3000.0000]

| Average_Mass | Apex_RT | Concentration |
|--------------|---------|---------------|
| 47336.0      | 30.99   | 2.19          |
| 47473.4      | 31.02   | 6.23          |
| 47854.8      | 31.09   | 27.73         |
| 49150.0      | 31.22   | 0.28          |
| 47252.3      | 31.27   | 5.56          |
| 46628.4      | 31.27   | 1.53          |

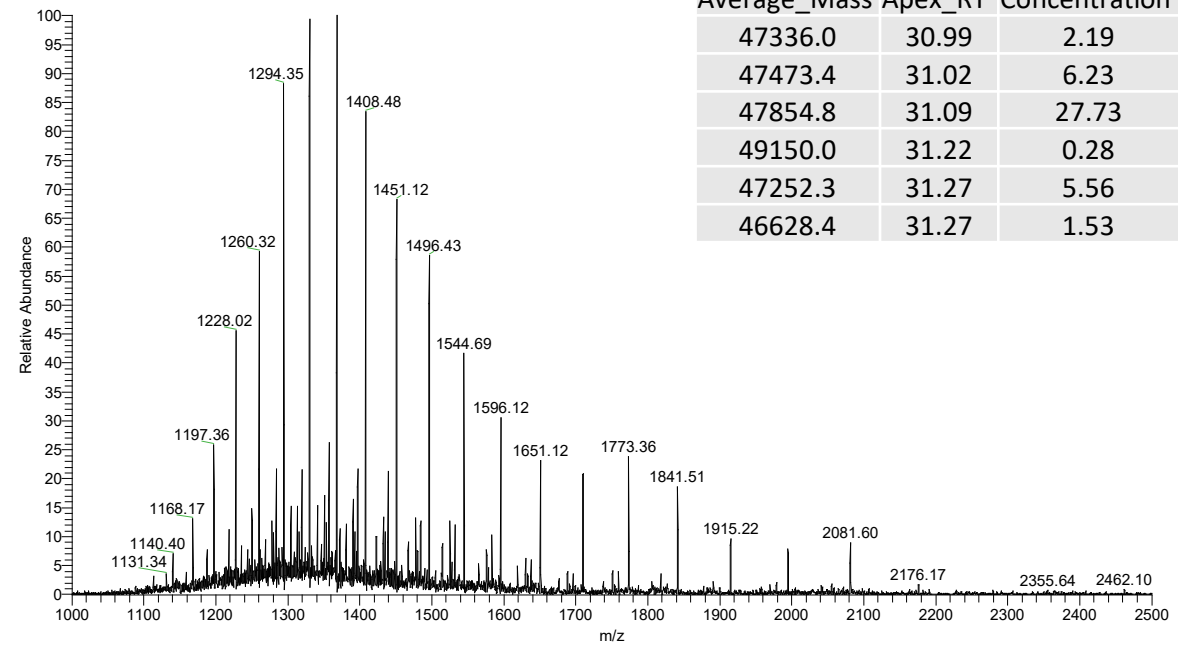

20191015\_OR15\_VQ1\_0247766\_SA\_S7T4\_Fab\_0p15flow\_15uL\_1x150col\_48 #5738-5870 RT: 30.90-31.60 AV: 133 NL: 1.14E4  
 T: FTMS + p ESI sid=15.00 Full ms [500.0000-3000.0000]

| Average_Mass | Apex_RT | Concentration |
|--------------|---------|---------------|
| 48085.5      | 31.32   | 0.58          |
| 46909.1      | 31.37   | 3.60          |
| 47180.4      | 31.44   | 0.97          |
| 47857.6      | 31.47   | 0.48          |
| 46981.1      | 31.54   | 1.16          |
| 48632.2      | 31.59   | 0.43          |
| 47266.6      | 31.79   | 3.87          |
| 47236.0      | 31.79   | 0.25          |
| 49021.2      | 31.92   | 3.51          |

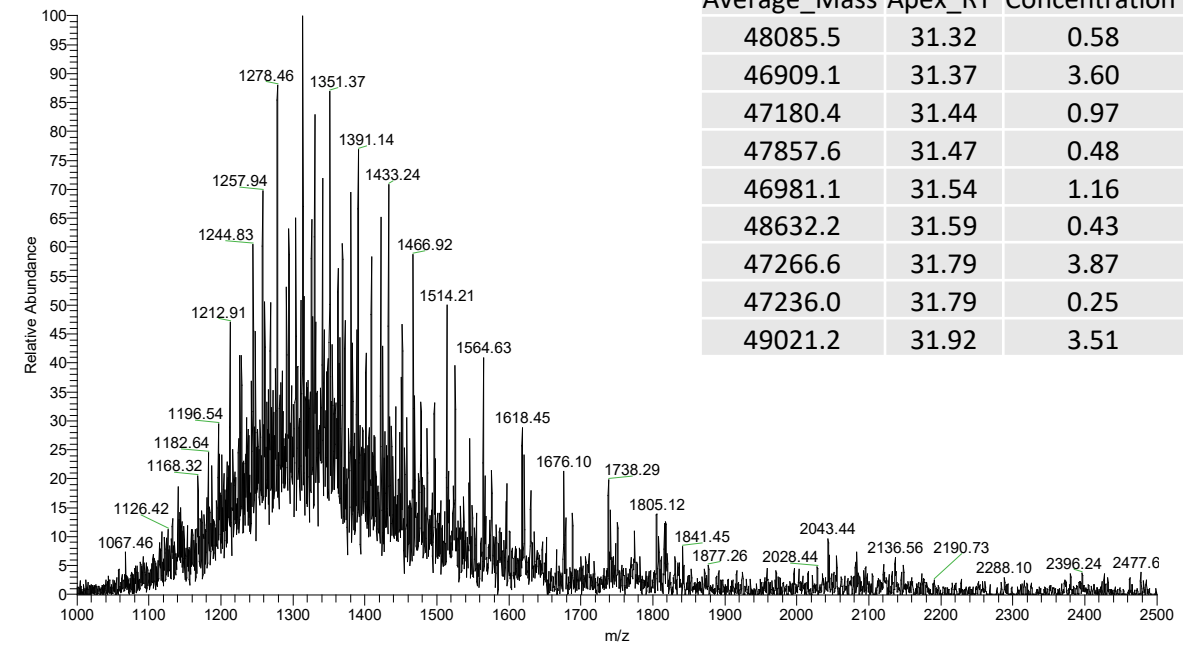

RT: 14.02 - 37.97

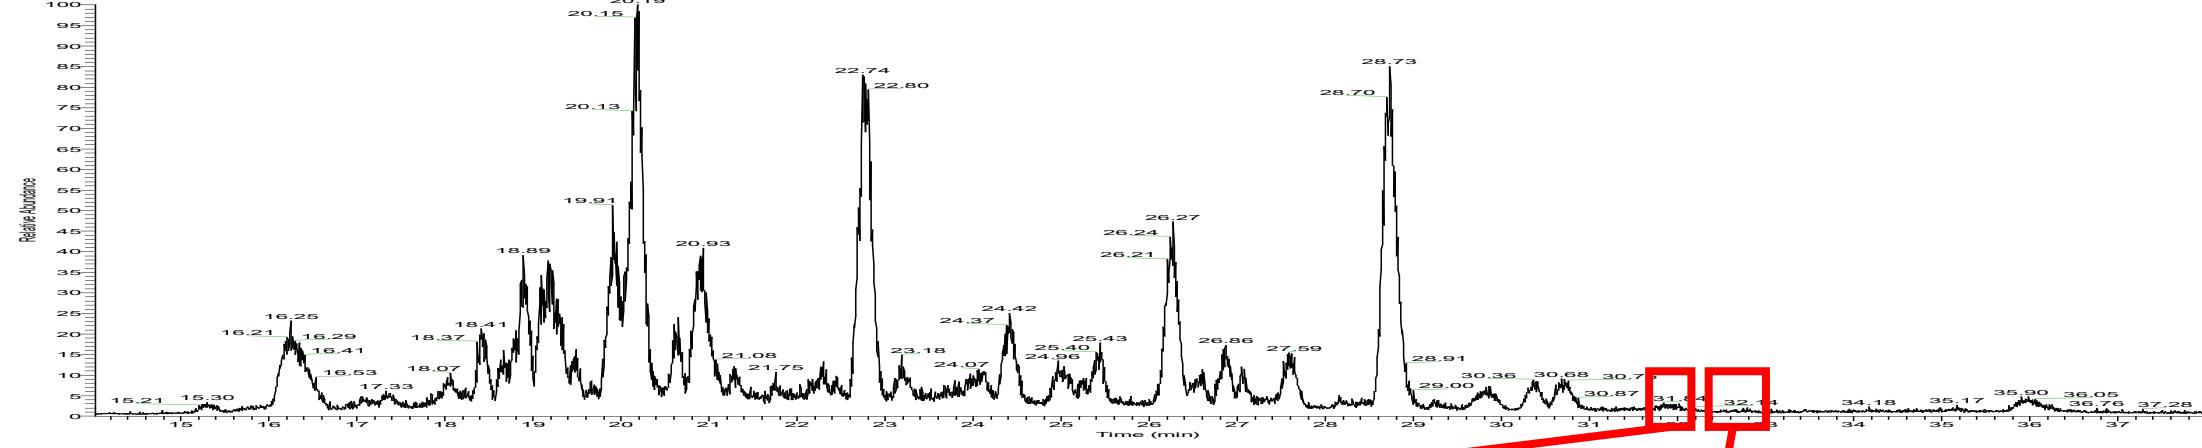

NL: 2.27E6  
 Base Peak F: ms  
 MS  
 20191015\_OR15\_VQ  
 1\_0247766\_SA\_S7T  
 1\_Fab\_0p15flow\_15u  
 L\_1x150col\_48

20191015\_OR15\_VQ1\_0247766\_SA\_S7T4\_Fab\_0p15flow\_15uL\_1x150col\_48 #5870-5983 RT: 31.60-32.20 AV: 114 NL: 2.46E4  
 T: FTMS + p ESI sid=15.00 Full ms [500.0000-3000.0000]

| Average_Mass | Apex_RT | Concentration |
|--------------|---------|---------------|
| 47058.1      | 32.07   | 0.24          |
| 48223.3      | 32.24   | 0.92          |
| 47884.4      | 32.27   | 12.04         |
| 50356.2      | 32.37   | 0.67          |
| 47278.2      | 32.37   | 0.50          |
| 50193.6      | 32.39   | 1.93          |
| 47745.4      | 32.44   | 0.44          |
| 47905.5      | 32.57   | 2.09          |
| 48184.5      | 32.60   | 0.27          |

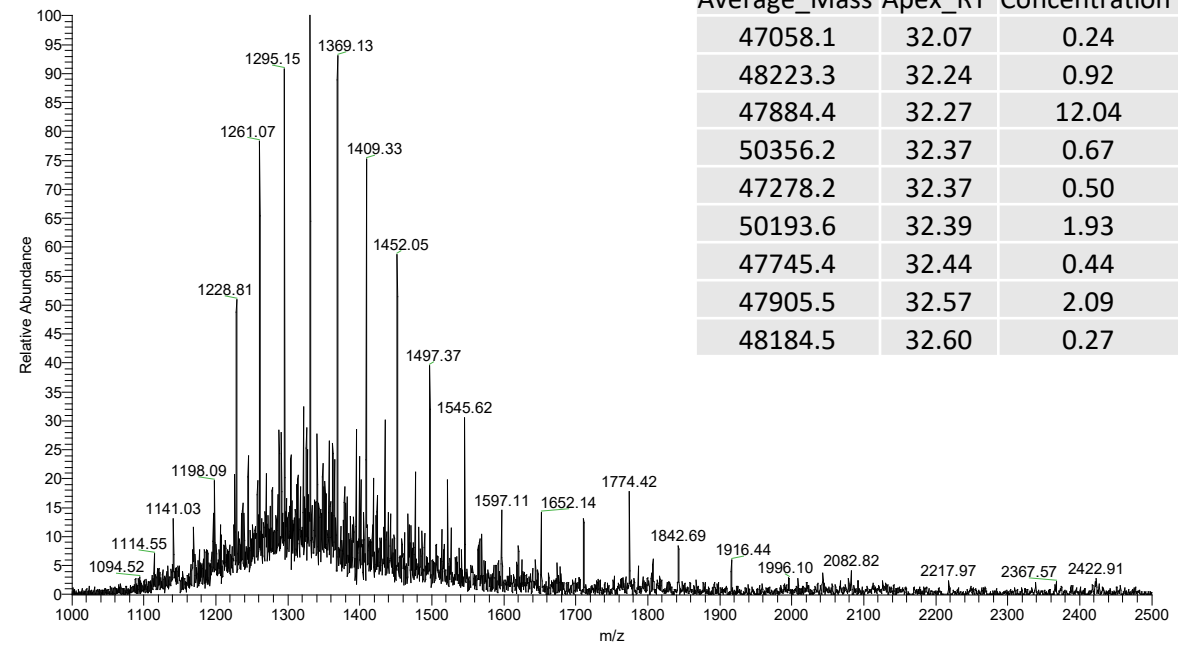

20191015\_OR15\_VQ1\_0247766\_SA\_S7T4\_Fab\_0p15flow\_15uL\_1x150col\_48 #5983-6134 RT: 32.20-33.00 AV: 152 NL: 5.96E3  
 T: FTMS + p ESI sid=15.00 Full ms [500.0000-3000.0000]

| Average_Mass | Apex_RT | Concentration |
|--------------|---------|---------------|
| 47645.6      | 32.62   | 0.64          |
| 48094.0      | 32.62   | 0.36          |
| 48183.8      | 32.69   | 0.69          |
| 49555.1      | 33.04   | 0.89          |
| 47542.8      | 33.04   | 0.50          |
| 47513.2      | 33.10   | 0.51          |
| 46943.9      | 33.24   | 1.35          |

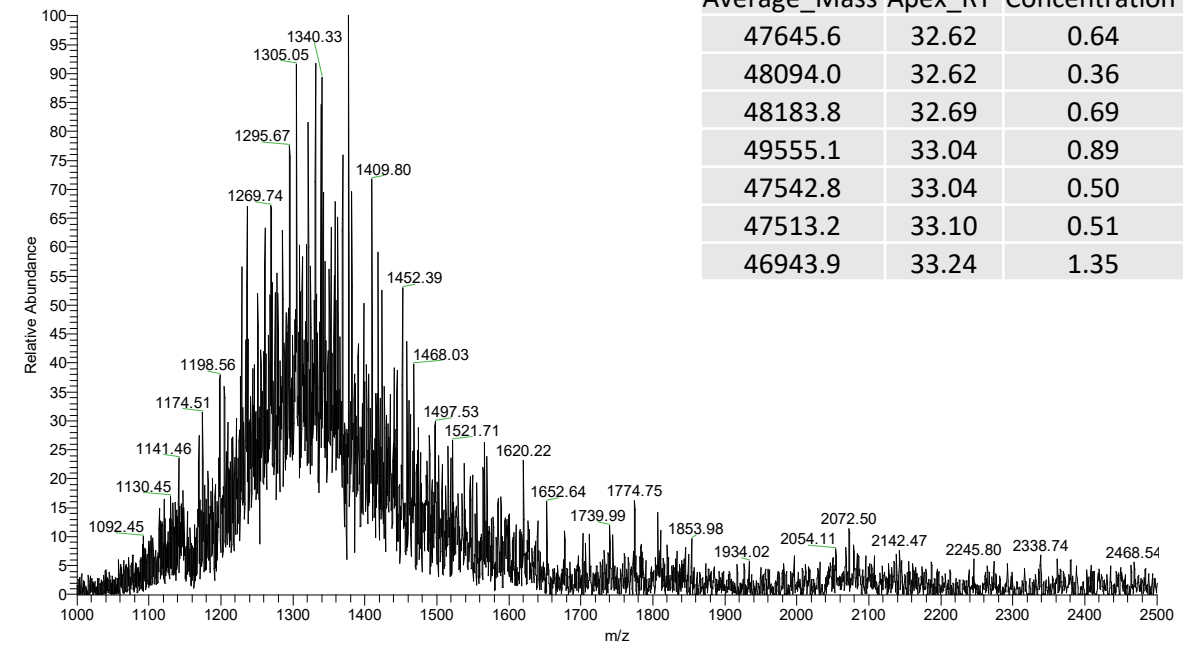



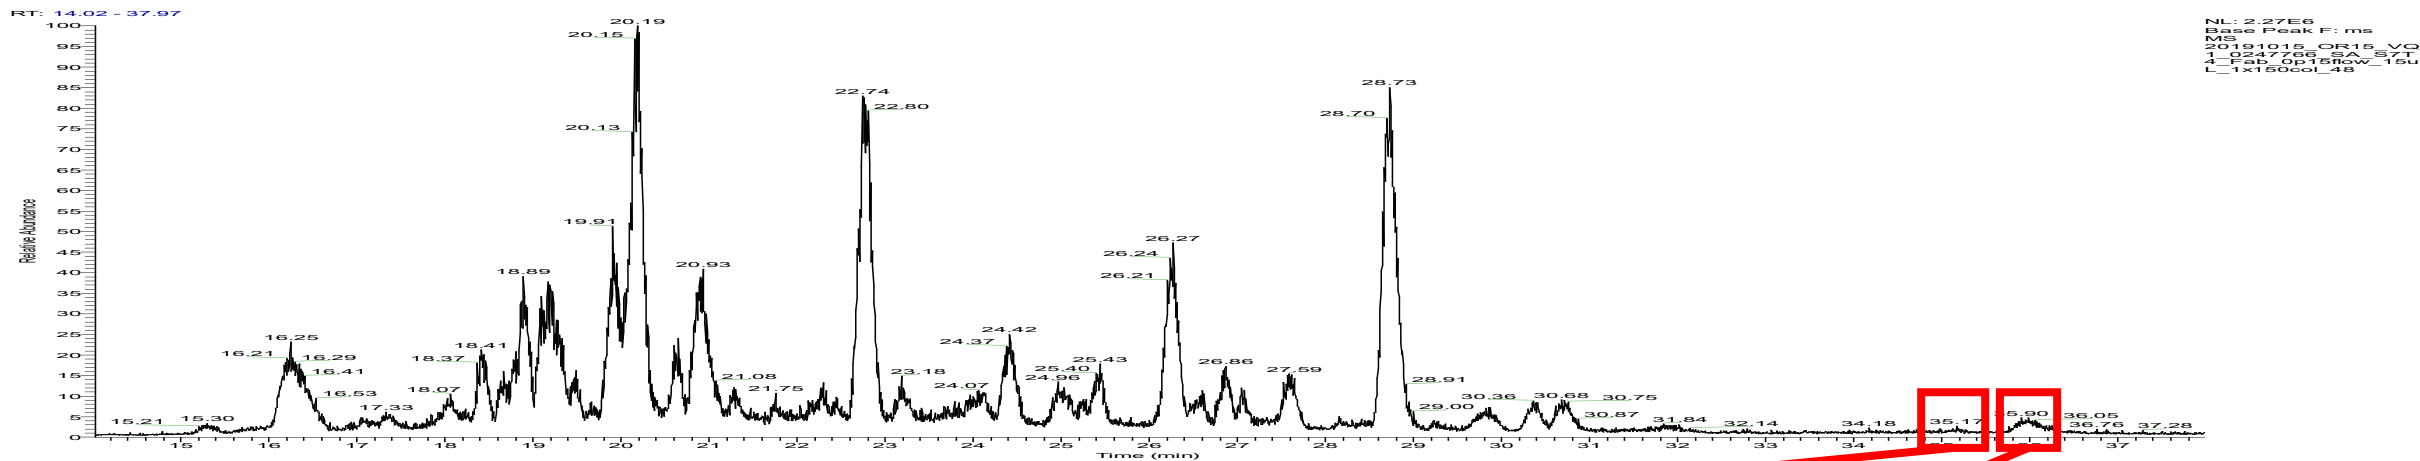

20191015\_OR15\_VQ1\_0247766\_SA\_S7T4\_Fab\_0p15flow\_15uL\_1x150col\_48 #6472-6604 RT: 34.80-35.50 AV: 133 NL: 9.98E3  
T: FTMS + p ESI sid=15.00 Full ms [500.0000-3000.0000]

| Average_Mass | Apex_RT | Concentration |
|--------------|---------|---------------|
| 49219.2      | 35.54   | 3.17          |

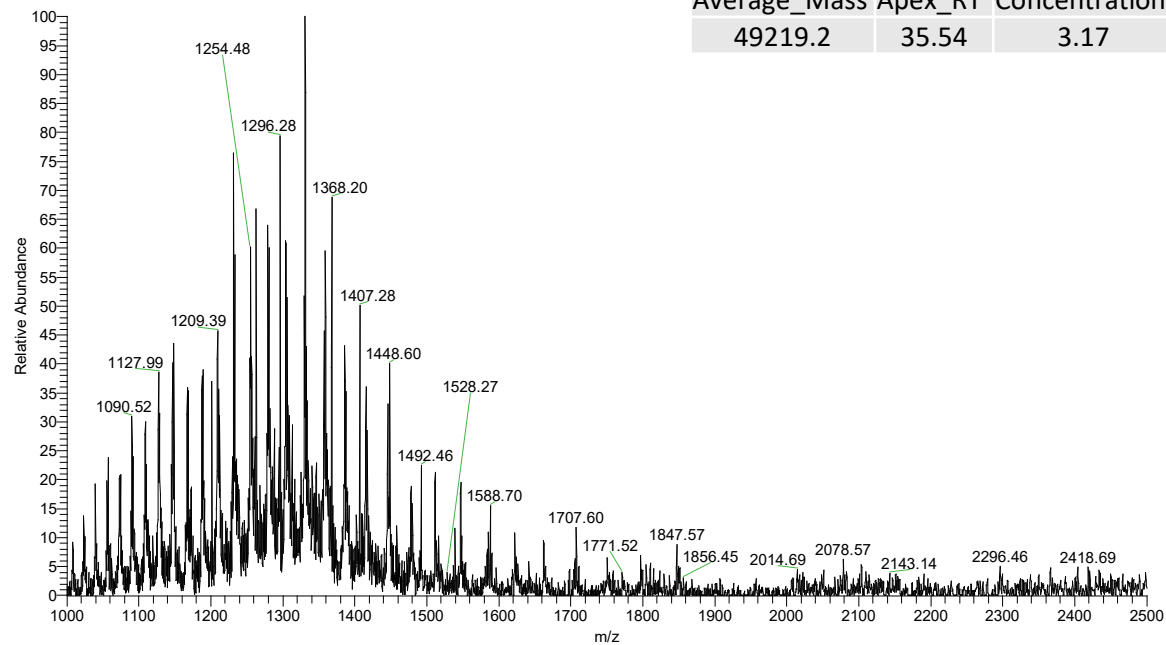

20191015\_OR15\_VQ1\_0247766\_SA\_S7T4\_Fab\_0p15flow\_15uL\_1x150col\_48 #6642-6754 RT: 35.70-36.30 AV: 113 NL: 4.45E4  
T: FTMS + p ESI sid=15.00 Full ms [500.0000-3000.0000]

| Average_Mass | Apex_RT | Concentration |
|--------------|---------|---------------|
| 47068.9      | 36.34   | 25.03         |

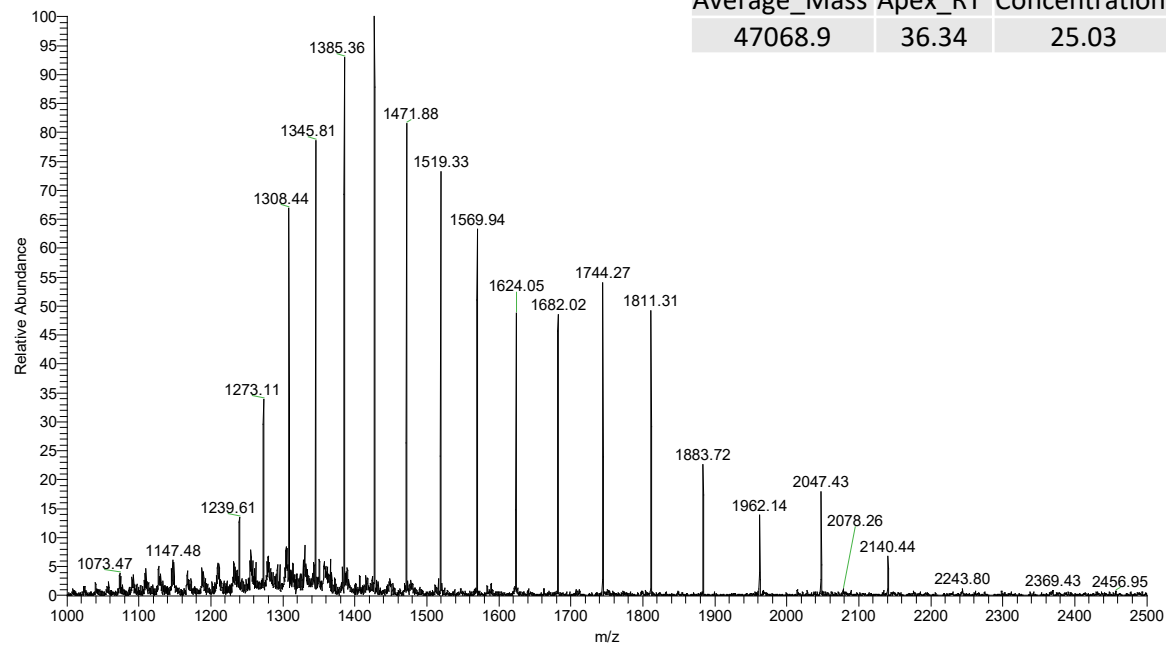

Supplement: mmc2.pdf [file mmc2.pdf]
